# Supplementary material for: Calculation of the Vapour Pressure of Organic Molecules by Means of a Group-Additivity Method and their Resultant Gibbs Free Energy and Entropy of Vaporization at 298.15K
Source: Preprints.org preprint supplement (doi:10.20944/preprints202101.0233.v1), 2021-01-12
Supplement: Supplementary file 1 [file supplementary]

| **Molecule name** | **logVP exp** | **logVP calc** | **logVP test** | **Deviation** |
| --- | --- | --- | --- | --- |
| (-)-Methyl jasmonate | -0.91 | -1.18 | -1.23 | 0.32 |
| (-)-trans-Pinocarveol | 1.34 | 1.2 | 1.24 | 0.1 |
| (+)-trans-Myrtanol | 0.37 | 1.01 | 1 | -0.64 |
| (2-Bromoethyl)benzene | 1.51 | 1.43 | 1.42 | 0.09 |
| (Chloromethyl)benzene | 2.24 | 2.17 | 2.16 | 0.08 |
| (E)-1,3,3,3-Tetrafluoropropene | 5.7 | 5.69 |  | 0.01 |
| (E)-1-Chloro-3,3,3-trifluoropropene | 5.12 | 4.88 | 4.85 | 0.26 |
| (Z)-1,3,3,3-Tetrafluoropropene | 5.28 | 5.69 |  | -0.41 |
| 1-(1,1-Difluoroethoxy)-1,1,2,2-tetrafluoroethane | 4.01 | 4.31 | 4.35 | -0.34 |
| 1-(2,2-Difluoroethoxy)-1,1,2,2,2-pentafluoroethane | 4.66 | 4.62 | 4.61 | 0.04 |
| 1-(2,2-Difluoroethoxy)-1,1,2,2,3,3,3-heptafluoropropane | 4.27 | 4.25 | 4.25 | 0.02 |
| 1-(2-Aminoethyl)-4-methylpiperazine | 1.42 | 1.6 | 1.58 | -0.16 |
| 1,1,1,2,2,3,3,4,4,5,5-Undecafluoro-5-methoxypentane | 3.97 | 4.01 | 4.02 | -0.05 |
| 1,1,1,2,2,3,3,4,4-Nonafluoro-4-propoxybutane | 3.78 | 3.63 | 3.61 | 0.17 |
| 1,1,1,2,2,3,3-Heptafluoro-3-(2,2,2-trifluoroethoxy)propane | 4.55 | 4.56 | 4.52 | 0.03 |
| 1,1,1,2,2,3,3-Heptafluoro-3-(2,2,3,3,3-pentafluoropropoxy)propane | 4.21 | 4.19 | 4.17 | 0.04 |
| 1,1,1,2,2,3,3-Heptafluoro-3-(2,2,3,3-tetrafluoropropoxy)propane | 3.97 | 3.88 | 3.88 | 0.09 |
| 1,1,1,2,2,3,3-Heptafluoro-3-(fluoromethoxy)propane | 4.7 | 4.48 |  | 0.22 |
| 1,1,1,2,2,3,3-Heptafluoro-4-methoxybutane | 4.21 | 4.26 | 4.25 | -0.04 |
| 1,1,1,2,2-Pentafluoro-3-(1,1,2,2-tetrafluoroethoxy)propane | 4.2 | 4.25 | 4.26 | -0.06 |
| 1,1,1,2,2-Pentafluoro-3-methoxypropane | 4.61 | 4.63 | 4.63 | -0.02 |
| 1,1,1,2,2-Pentafluoro-3-pentafluoroethoxypropane | 4.64 | 4.56 | 4.55 | 0.09 |
| 1,1,1,2,2-Pentafluoropropane | 5.67 | 5.6 | 5.63 | 0.04 |
| 1,1,1,2,3,3,3-Heptafluoropropane | 5.66 | 5.46 | 5.44 | 0.22 |
| 1,1,1,2,3,3,4,4-Octafluoro-4-methoxy-2-trifluoromethylbutane | 3.99 | 4.03 | 4 | -0.01 |
| 1,1,1,2,3,3-Hexafluoro-3-(2,2,2-trifluoroethoxy)propane | 4.15 | 4.33 | 4.34 | -0.19 |
| 1,1,1,2,3,3-Hexafluoro-3-(2,2,3,3,3-pentafluoropropoxy)propane | 3.87 | 3.96 | 4 | -0.13 |
| 1,1,1,2,3,3-Hexafluoro-3-(2,2,3,3-tetrafluoropropoxy)propane | 3.5 | 3.65 | 3.68 | -0.18 |
| 1,1,1,2,3,3-Hexafluoro-3-methoxypropane | 4.5 | 4.52 | 4.52 | -0.02 |
| 1,1,1,2,3,3-Hexafluoro-4-methoxybutane | 3.91 | 3.8 | 3.71 | 0.2 |
| 1,1,1,2,3,3-Hexafluoro-4-trifluoromethoxybutane | 4.32 | 4.62 | 4.69 | -0.37 |
| 1,1,1,2,3,3-Hexafluoropropane | 5.42 | 5.15 | 5.07 | 0.35 |
| 1,1,1,2,4,4,4-Heptafluoro-2-trifluoromethoxybutane | 4.57 | 4.19 | 4.03 | 0.54 |
| 1,1,1,2,4,4-Hexafluoro-2-(trifluoromethoxy)butane | 4.42 | 4.5 | 4.52 | -0.1 |
| 1,1,1,2-Tetrachlorodifluoroethane | 3.86 | 4.02 | 4.04 | -0.18 |
| 1,1,1,2-Tetrachloroethane | 3.22 | 3.24 | 3.28 | -0.06 |
| 1,1,1,2-Tetrafluoro-2-(trifluoromethoxy)butane | 4.66 | 4.72 | 4.9 | -0.24 |
| 1,1,1,3,3,3-Hexafluoro-2-fluoromethoxypropane | 4.41 | 4.59 |  | -0.18 |
| 1,1,1,3,3,3-Hexafluoro-2-methoxy-2-(trifluoromethyl)propane | 4.53 | 4.74 | 4.74 | -0.21 |
| 1,1,1,3,3,3-Hexafluoro-2-methoxypropane | 4.56 | 4.86 | 4.84 | -0.28 |
| 1,1,1,3,3,3-Hexafluoropropane | 5.43 | 5.59 | 5.58 | -0.15 |
| 1,1,1,3,3-Pentafluoro-3-methoxy-2-trifluoromethylpropane | 4.23 | 4.53 | 4.5 | -0.27 |
| 1,1,1,3,3-Pentafluorobutane | 4.75 | 5.13 | 5.16 | -0.41 |
| 1,1,1,3,3-Pentafluoropropane | 5.48 | 5.28 | 5.28 | 0.2 |
| 1,1,1-Trichloroethane | 4.21 | 4.31 | 4.33 | -0.12 |
| 1,1,1-Trichloropropane | 3.62 | 3.84 | 3.87 | -0.25 |
| 1,1,1-Trichlorotrifluoroethane | 4.68 | 4.4 | 4.38 | 0.3 |
| 1,1,1-Trifluoro-2-(1,1,2-trifluoroethoxy)ethane | 4.29 | 4.65 | 4.72 | -0.43 |
| 1,1,1-Trifluoro-2-(2,2,2-trifluoroethoxy)ethane | 4.32 | 4.81 | 4.83 | -0.51 |
| 1,1,1-Trifluoroethane | 6.1 | 5.97 | 5.99 | 0.11 |
| 1,1,2,2,3,3,4,4-Octafluoro-5-methoxypentane | 3.17 | 3.58 | 3.6 | -0.43 |
| 1,1,2,2,3,3-Hexafluoro-1-methoxypropane | 4.26 | 4.44 | 4.42 | -0.16 |
| 1,1,2,2,3-Pentafluoropropane | 4.99 | 5.1 | 5.09 | -0.1 |
| 1,1,2,2-Tetrachloro-1,2-difluoroethane | 3.82 | 3.96 |  | -0.14 |
| 1,1,2,2-Tetrachloroethane | 2.84 | 2.82 | 2.82 | 0.02 |
| 1,1,2,2-Tetrafluoro-1-(2,2,2-trifluoroethoxy)ethane | 4.45 | 4.62 | 4.62 | -0.17 |
| 1,1,2,2-Tetrafluoro-1-fluoromethoxyethane | 4.5 | 4.57 |  | -0.07 |
| 1,1,2,2-Tetrafluoro-3-(1,1,2,2-tetrafluoroethoxy)propane | 3.74 | 3.94 | 3.97 | -0.23 |
| 1,1,2,2-Tetrafluoro-3-methoxypropane | 4.15 | 4.32 | 4.34 | -0.19 |
| 1,1,2,2-Tetrafluoro-3-pentafluoroethoxypropane | 4.35 | 4.25 | 4.21 | 0.14 |
| 1,1,2,2-Tetrafluoro-3-trifluoromethoxypropane | 4.65 | 4.91 | 4.91 | -0.26 |
| 1,1,2-Trichloroethane | 3.5 | 3.28 | 3.26 | 0.24 |
| 1,1,2-Trichloropropane | 2.61 | 3.13 | 3.19 | -0.58 |
| 1,1,2-Trifluoro-1-methoxyethane | 4.69 | 4.84 | 4.86 | -0.17 |
| 1,1,2-Trifluoroethane | 5.33 | 5.47 | 5.51 | -0.18 |
| 1,1,3-Trimethylcyclopentane | 3.73 | 3.79 | 3.78 | -0.05 |
| 1,10-Decanediol | -2.3 | -2.55 | -2.56 | 0.26 |
| 1,10-Decanediol dinitrate | -2 | -1.62 | -1.59 | -0.41 |
| 1,11-Undecanediol | -3.08 | -3.01 | -3.01 | -0.07 |
| 1,12-Dodecanediol | -3.57 | -3.48 | -3.49 | -0.08 |
| 1,13-Tridecanediol | -3.99 | -3.95 | -3.99 | 0 |
| 1,14-Tetradecanediol | -4.45 | -4.42 | -4.44 | -0.01 |
| 1,15-Pentadecanediol | -4.92 | -4.89 | -4.91 | -0.01 |
| 1,16-Hexadecanediol | -5.25 | -5.36 | -5.36 | 0.11 |
| 1,1-Bis(4-methylphenyl)ethane | -0.86 | -0.6 | -0.57 | -0.29 |
| 1,1-Dichloro-1-fluoroethane | 4.9 | 4.92 |  | -0.02 |
| 1,1-Dichlorobutane | 3.48 | 3.41 | 3.44 | 0.04 |
| 1,1-Dichloroethane | 4.48 | 4.35 | 4.35 | 0.13 |
| 1,1-Dichloropropane | 3.76 | 3.88 | 3.9 | -0.14 |
| 1,1-Dichlorotetrafluoroethane | 5.34 | 5.01 | 4.95 | 0.39 |
| 1,1-Diethylcyclohexane | 2.23 | 2.33 | 2.36 | -0.13 |
| 1,1-Difluoro-2-methoxyethane | 4.6 | 4.69 | 4.64 | -0.04 |
| 1,1-Difluoroethane | 5.78 | 5.66 | 5.66 | 0.12 |
| 1,1-Difluoroethylene | 6.56 | 6.32 | 6.3 | 0.26 |
| 1,1-Dimethylcyclohexane | 3.48 | 3.27 | 3.26 | 0.22 |
| 1,1-Dimethylcyclopentane | 4.05 | 4 | 4.01 | 0.04 |
| 1,1-Diphenylbutane | -0.63 | -1.02 | -1.08 | 0.45 |
| 1,1-Diphenylethane | -0.2 | -0.08 | -0.07 | -0.13 |
| 1,1-Diphenylpropane | -0.26 | -0.55 | -0.61 | 0.35 |
| 1,2,3,4,5,6,7-Heptachloronaphthalene | -3.65 | -3.48 | -3.51 | -0.14 |
| 1,2,3,4,5,6,8-Heptachloronaphthalene | -3.61 | -3.48 | -3.45 | -0.16 |
| 1,2,3,4,5,7-Hexachloronaphthalene | -2.87 | -2.84 | -2.85 | -0.02 |
| 1,2,3,4,6,7,8-Heptachlorodibenzofuran | -5.71 | -5.94 | -5.92 | 0.21 |
| 1,2,3,4,6,7,8-Heptachlorodibenzo-p-dioxin | -6.69 | -6.42 | -6.36 | -0.33 |
| 1,2,3,4,6,7-Hexachloronaphthalene | -2.92 | -2.84 | -2.84 | -0.08 |
| 1,2,3,4,6,8,9-Heptachlorodibenzofuran | -6.09 | -5.94 | -5.97 | -0.12 |
| 1,2,3,4,6,8-Hexachlorodibenzofuran | -5.12 | -5.3 | -5.31 | 0.2 |
| 1,2,3,4,6-Pentachloronaphthalene | -2.32 | -2.2 | -2.24 | -0.08 |
| 1,2,3,4,7,8,9-Heptachlorodibenzofuran | -5.88 | -5.94 | -5.92 | 0.04 |
| 1,2,3,4,7,8-Hexachlorodibenzofuran | -5.11 | -5.3 | -5.27 | 0.17 |
| 1,2,3,4,7,8-Hexachlorodibenzo-p-dioxin | -5.84 | -5.78 | -5.79 | -0.05 |
| 1,2,3,4,7-Pentachlorodibenzofuran | -4.61 | -4.66 | -4.62 | 0.01 |
| 1,2,3,4,7-Pentachlorodibenzo-p-dioxin | -5.34 | -5.14 | -5.15 | -0.19 |
| 1,2,3,4-Tetrachlorobenzene | 0.32 | 0.94 | 0.93 | -0.61 |
| 1,2,3,4-Tetrachlorodibenzofuran | -3.93 | -4.02 | -3.99 | 0.06 |
| 1,2,3,4-Tetrachloronaphthalene | -1.76 | -1.56 | -1.61 | -0.15 |
| 1,2,3,4-Tetrafluorobenzene | 3.82 | 3.9 | 3.88 | -0.06 |
| 1,2,3,5,6,7-Hexachloronaphthalene | -2.92 | -2.84 | -2.88 | -0.04 |
| 1,2,3,5,7,8-Hexachloronaphthalene | -3 | -2.84 | -2.87 | -0.13 |
| 1,2,3,5,7-Pentachloronaphthalene | -2.23 | -2.2 | -2.23 | 0 |
| 1,2,3,5,8-Pentachloronaphthalene | -2.48 | -2.2 | -2.17 | -0.31 |
| 1,2,3,5-Tetrachlorobenzene | 1.24 | 0.94 | 0.95 | 0.29 |
| 1,2,3,5-Tetrachloronaphthalene | -1.75 | -1.56 | -1.57 | -0.18 |
| 1,2,3,5-Tetraethylbenzene | 0.36 | 0.58 | 0.65 | -0.29 |
| 1,2,3,5-Tetrafluorobenzene | 3.99 | 3.9 | 3.9 | 0.09 |
| 1,2,3,5-Tetramethylbenzene | 1.81 | 2.46 | 2.53 | -0.72 |
| 1,2,3,6,7,8-Hexachlorodibenzofuran | -5.14 | -5.3 | -5.31 | 0.18 |
| 1,2,3,6,7,8-Hexachlorodibenzo-p-dioxin | -6.07 | -5.78 | -5.81 | -0.26 |
| 1,2,3,7,8,9-Hexachlorodibenzofuran | -5.3 | -5.3 | -5.28 | -0.02 |
| 1,2,3,7,8,9-Hexachlorodibenzo-p-dioxin | -6.07 | -5.78 | -5.78 | -0.29 |
| 1,2,3,7,8-Pentachlorodibenzofuran | -4.49 | -4.66 | -4.63 | 0.14 |
| 1,2,3,7,8-Pentachlorodibenzo-p-dioxin | -5.38 | -5.14 | -5.15 | -0.23 |
| 1,2,3,7-Tetrachlorodibenzofuran | -3.85 | -4.02 | -3.99 | 0.14 |
| 1,2,3,7-Tetrachlorodibenzo-p-dioxin | -4.57 | -4.5 | -4.51 | -0.06 |
| 1,2,3-Trichlorobenzene | 1.44 | 1.58 | 1.57 | -0.13 |
| 1,2,3-Trichloronaphthalene | -1.19 | -0.92 | -0.92 | -0.27 |
| 1,2,3-Trichloropropane | 2.71 | 2.52 | 2.53 | 0.18 |
| 1,2,3-Triethylbenzene | 1.26 | 1.31 | 1.32 | -0.06 |
| 1,2,4,5,6,8-Hexachloronaphthalene | -3.02 | -2.84 | -2.87 | -0.15 |
| 1,2,4,5-Tetrachlorobenzene | 1.37 | 0.94 | 0.93 | 0.44 |
| 1,2,4,5-Tetrafluorobenzene | 3.88 | 3.9 | 3.97 | -0.09 |
| 1,2,4,5-Tetramethylbenzene | 1.82 | 2.46 | 2.45 | -0.63 |
| 1,2,4,6,7,8-Hexachlorodibenzofuran | -5.35 | -5.3 | -5.26 | -0.09 |
| 1,2,4,6,7,9-Hexachlorodibenzo-p-dioxin | -5.87 | -5.75 | -5.73 | -0.14 |
| 1,2,4,6,8,9-Hexachlorodibenzofuran | -5.04 | -5.3 | -5.28 | 0.25 |
| 1,2,4,7,8-Pentachlorodibenzofuran | -4.63 | -4.66 | -4.69 | 0.06 |
| 1,2,4,7,8-Pentachlorodibenzo-p-dioxin | -5.22 | -5.14 | -5.08 | -0.14 |
| 1,2,4,7-Tetrachloronaphthalene | -1.61 | -1.56 | -1.58 | -0.03 |
| 1,2,4-Trichlorobenzene | 1.59 | 1.58 | 1.56 | 0.03 |
| 1,2,4-Trichlorodibenzo-p-dioxin | -4 | -3.86 | -3.87 | -0.13 |
| 1,2,4-Triethylbenzene | 1.54 | 1.31 | 1.3 | 0.24 |
| 1,2,4-Trimethylbenzene | 2.44 | 2.72 | 2.72 | -0.28 |
| 1,2,7,8-Tetrachlorodibenzofuran | -3.98 | -3.97 | -3.98 | 0 |
| 1,2,7,8-Tetrachlorodibenzo-p-dioxin | -4.36 | -4.5 | -4.49 | 0.13 |
| 1,2-Benzenedicarboxylic acid, di-2-propenyl ester | -1.67 | -1.3 | -1.32 | -0.35 |
| 1,2-Bis(2-aminoethoxy)ethane | 0.73 | 0.96 | 0.99 | -0.26 |
| 1,2-Bis(dimethylamino)ethane | 3.33 | 3.3 | 3.33 | 0 |
| 1,2-Butanediamine | 2.63 | 2.83 | 2.83 | -0.2 |
| 1,2-Butanediol | 0.98 | 0.8 | 0.77 | 0.21 |
| 1,2-Dibromobenzene | 1.42 | 1.64 | 1.67 | -0.25 |
| 1,2-Dibromobutane | 2.61 | 2.47 | 2.5 | 0.11 |
| 1,2-Dibromoethane | 3.17 | 3.2 | 3.17 | 0 |
| 1,2-Dibromoheptane | 1.33 | 1.06 | 1.05 | 0.28 |
| 1,2-Dibromopropane | 3.02 | 2.94 | 2.93 | 0.09 |
| 1,2-Dibromotetrafluoroethane | 4.72 | 4.56 |  | 0.16 |
| 1,2-Dichloro-1,1,2-trifluoroethane | 4.94 | 4.99 | 4.98 | -0.04 |
| 1,2-Dichlorobenzene | 2.26 | 2.22 | 2.19 | 0.07 |
| 1,2-Dichlorobutane | 3.35 | 3.12 | 3.13 | 0.22 |
| 1,2-Dichloronaphthalene | -0.48 | -0.28 | -0.31 | -0.17 |
| 1,2-Dichloropropane | 3.81 | 3.59 | 3.61 | 0.2 |
| 1,2-Diethylbenzene | 2.14 | 2.04 | 2.01 | 0.13 |
| 1,2-Difluorobenzene | 3.63 | 3.7 | 3.67 | -0.04 |
| 1,2-Dimethylbenzene | 2.95 | 2.98 | 2.95 | 0 |
| 1,2-Dimethylnaphthalene | -0.06 | 0.48 | 0.5 | -0.56 |
| 1,2-Diphenylethane | -0.13 | -0.34 | -0.36 | 0.23 |
| 1,2-Ethanediamine | 3.24 | 3.46 | 3.46 | -0.22 |
| 1,2-Ethanediol | 1.08 | 1.22 | 1.21 | -0.13 |
| 1,2-Ethanediol dinitrate | 2.29 | 2.14 | 2.12 | 0.17 |
| 1,2-Ethanedithiol | 3.03 | 3.18 | 3.19 | -0.16 |
| 1,2-Hexanediol | 0.13 | -0.14 | -0.14 | 0.27 |
| 1,2-Pentadiene | 4.69 | 4.61 |  | 0.08 |
| 1,2-Pentanediol | 0.54 | 0.33 | 0.33 | 0.21 |
| 1,2-Propanediol | 1.24 | 1.27 | 1.24 | 0 |
| 1,3,5,7-Tetrachloronaphthalene | -1.38 | -1.56 | -1.57 | 0.19 |
| 1,3,5,8-Tetrachloronaphthalene | -1.68 | -1.56 | -1.59 | -0.09 |
| 1,3,5-Tribromobenzene | 0.72 | 0.71 | 0.68 | 0.03 |
| 1,3,5-Trichlorobenzene | 1.8 | 1.58 | 1.55 | 0.24 |
| 1,3,5-Trifluorobenzene | 4.14 | 3.8 | 3.78 | 0.36 |
| 1,3,5-Trimethylbenzene | 2.53 | 2.72 | 2.73 | -0.2 |
| 1,3,6,8-Tetrachlorodibenzofuran | -3.53 | -4.02 | -4.04 | 0.51 |
| 1,3,6,8-Tetrachlorodibenzo-p-dioxin | -4.17 | -4.5 | -4.51 | 0.34 |
| 1,3,7,8-Tetrachlorodibenzofuran | -3.7 | -4.02 | -3.98 | 0.28 |
| 1,3,7,8-Tetrachlorodibenzo-p-dioxin | -4.38 | -4.5 | -4.49 | 0.11 |
| 1,3,7,9-Tetrachlorodibenzofuran | -3.75 | -4.02 | -4 | 0.25 |
| 1,3,7,9-Tetrachlorodibenzo-p-dioxin | -4.26 | -4.5 | -4.47 | 0.21 |
| 1,3,7-Trichlorodibenzo-p-dioxin | -4.44 | -3.86 | -3.8 | -0.64 |
| 1,3,7-Trichloronaphthalene | -0.94 | -0.92 | -0.97 | 0.03 |
| 1,3-Butanediol dinitrate | 1.59 | 1.44 | 1.39 | 0.19 |
| 1,3-Butyleneglycol | 0.4 | 0.8 | 0.8 | -0.4 |
| 1,3-Dibromobenzene | 1.55 | 1.64 | 1.67 | -0.12 |
| 1,3-Dibromopropane | 2.26 | 2.73 | 2.82 | -0.56 |
| 1,3-Dichloro-2-propanol | 2.02 | 1.83 | 1.83 | 0.19 |
| 1,3-Dichlorobenzene | 2.39 | 2.22 | 2.23 | 0.16 |
| 1,3-Dichloronaphthalene | -0.46 | -0.28 | -0.31 | -0.15 |
| 1,3-Dichloropropane | 3.39 | 3.27 | 3.26 | 0.13 |
| 1,3-Dichloro-trans-2-butene | 3.16 | 3.26 | 3.28 | -0.12 |
| 1,3-Diethylbenzene | 2.17 | 2.04 | 2.06 | 0.11 |
| 1,3-Dihydroisobenzofuran | 1.92 | 1.35 | 1.3 | 0.62 |
| 1,3-Diisopropylbenzene | 1.74 | 1.62 | 1.63 | 0.11 |
| 1,3-Diisopropylnaphthalene | -0.67 | -0.88 | -0.88 | 0.21 |
| 1,3-Dimethylbenzene | 3.04 | 2.98 | 2.97 | 0.07 |
| 1,3-Dimethylnaphthalene | 0.29 | 0.48 | 0.47 | -0.18 |
| 1,3-Dioxane | 3.64 | 3.45 | 3.38 | 0.26 |
| 1,3-Dioxolane | 4.04 | 3.94 | 3.91 | 0.13 |
| 1,3-Divinylbenzene | 1.97 | 2.38 | 2.33 | -0.36 |
| 1,3-Pentanediamine | 2.32 | 2.36 | 2.37 | -0.05 |
| 1,3-Propanediamine | 2.76 | 2.99 | 3 | -0.24 |
| 1,3-Propanediol | 0.79 | 0.75 | 0.74 | 0.05 |
| 1,3-Propanediol dinitrate | 1.73 | 1.67 | 1.7 | 0.03 |
| 1,4,5-Trimethylnaphthalene | -0.17 | 0.22 | 0.2 | -0.37 |
| 1,4-Butanediamine | 2.28 | 2.52 | 2.52 | -0.24 |
| 1,4-Butanediol dinitrate | 1.13 | 1.2 | 1.16 | -0.03 |
| 1,4-Butanedithiol | 1.98 | 2.24 | 2.24 | -0.26 |
| 1,4-Dichlorobenzene | 2.38 | 2.22 | 2.25 | 0.13 |
| 1,4-Dichlorobutane | 2.76 | 2.8 | 2.81 | -0.05 |
| 1,4-Dichloronaphthalene | -0.38 | -0.28 | -0.31 | -0.07 |
| 1,4-Diethylbenzene | 2.14 | 2.04 | 2.06 | 0.08 |
| 1,4-Diisopropylbenzene | 1.52 | 1.62 | 1.63 | -0.11 |
| 1,4-Dimethylbenzene | 3.08 | 2.98 | 2.97 | 0.11 |
| 1,4-Dimethylnaphthalene | 0.36 | 0.48 | 0.48 | -0.12 |
| 1,4-Dimethylpiperazine | 3.19 | 3.22 | 3.2 | -0.01 |
| 1,4-Dioxane | 3.71 | 4.12 | 4.13 | -0.42 |
| 1,4-Di-t-butylbenzene | 0.9 | 0.98 | 1.01 | -0.11 |
| 1,4-Pentadiene | 4.99 | 4.81 | 4.82 | 0.17 |
| 1,5-Diamino-2-methylpentane | 1.64 | 1.84 | 1.83 | -0.19 |
| 1,5-Dichloronaphthalene | -0.45 | -0.28 | -0.29 | -0.16 |
| 1,5-Dichloropentane | 2.17 | 2.33 | 2.36 | -0.19 |
| 1,5-Dimethylnaphthalene | 0.29 | 0.48 | 0.49 | -0.2 |
| 1,5-Hexadiene | 4.47 | 4.34 | 4.36 | 0.11 |
| 1,5-Pentanediamine | 1.85 | 2.05 | 2.04 | -0.19 |
| 1,5-Pentanediol | -0.27 | -0.19 | -0.21 | -0.06 |
| 1,5-Pentanediol dinitrate | 0.74 | 0.73 | 0.7 | 0.04 |
| 1,5-Pentanedithiol | 1.57 | 1.77 | 1.77 | -0.2 |
| 1,6,7-Trimethylnaphthalene | -0.34 | 0.22 | 0.2 | -0.54 |
| 1,6-Dichloronaphthalene | -0.45 | -0.28 | -0.31 | -0.14 |
| 1,6-Dimethylnaphthalene | 0.31 | 0.48 | 0.45 | -0.14 |
| 1,6-Hexanediamine | 1.64 | 1.58 | 1.56 | 0.08 |
| 1,6-Hexanedioic acid | -3.37 | -3.48 | -3.5 | 0.13 |
| 1,6-Hexanediol dinitrate | 0.05 | 0.26 | 0.25 | -0.2 |
| 1,6-Hexanedithiol | 1.14 | 1.3 | 1.27 | -0.13 |
| 1,7-Dichloronaphthalene | -0.45 | -0.28 | -0.31 | -0.14 |
| 1,7-Heptanediamine | 1.24 | 1.11 | 1.09 | 0.15 |
| 1,7-Heptanediol | -1.22 | -1.13 | -1.15 | -0.07 |
| 1,7-Heptanediol dinitrate | -0.46 | -0.21 | -0.24 | -0.22 |
| 1,7-Heptanedithiol | 0.84 | 0.83 | 0.83 | 0.01 |
| 1,8-Cineole | 1.96 | 2.15 | 2.09 | -0.13 |
| 1,8-Dichloronaphthalene | -0.7 | -0.28 | -0.31 | -0.39 |
| 1,8-Octanediamine | 0.74 | 0.64 | 0.63 | 0.11 |
| 1,8-Octanediol | -1.74 | -1.61 | -1.6 | -0.14 |
| 1,8-Octanediol dinitrate | -1.05 | -0.68 | -0.65 | -0.4 |
| 1,9-Nonanediol | -2.14 | -2.07 | -2.07 | -0.07 |
| 1-Acetyladamantane | 0.22 | -0.05 | -0.13 | 0.35 |
| 1-Adamantanol | 0.29 | 0.09 | -0.05 | 0.34 |
| 1-Amino-3-methoxypropane | 3.28 | 3.23 | 3.18 | 0.1 |
| 1-Azidooctane | 1.63 | 1.35 | 1.32 | 0.31 |
| 1-Benzylpyrazole | 0.17 | 0.21 | 0.19 | -0.02 |
| 1-Bromo-2-chloro-1,1,2-trifluoroethane | 4.56 | 4.62 |  | -0.06 |
| 1-Bromo-2-chloroethane | 3.65 | 3.47 | 3.46 | 0.19 |
| 1-Bromo-2-ethylbenzene | 1.52 | 1.84 | 1.82 | -0.3 |
| 1-Bromo-2-fluorobenzene | 2.68 | 2.67 | 2.65 | 0.03 |
| 1-Bromo-3-fluorobenzene | 2.85 | 2.67 | 2.66 | 0.19 |
| 1-Bromo-4-chlorobenzene | 1.83 | 1.93 | 1.96 | -0.13 |
| 1-Bromo-4-fluorobenzene | 2.78 | 2.67 | 2.7 | 0.08 |
| 1-Bromobutane | 3.74 | 3.6 | 3.61 | 0.13 |
| 1-Bromodecane | 0.72 | 0.78 | 0.78 | -0.06 |
| 1-Bromododecane | -0.28 | -0.16 | -0.16 | -0.12 |
| 1-Bromonaphthalene | 0.13 | 0.07 | 0.04 | 0.09 |
| 1-Bromononane | 1.21 | 1.25 | 1.25 | -0.04 |
| 1-Bromooctane | 1.71 | 1.72 | 1.72 | -0.01 |
| 1-Bromopentane | 3.23 | 3.13 | 3.13 | 0.1 |
| 1-Bromoperfluorooctane | 2.84 | 3.09 |  | -0.25 |
| 1-Bromopropane | 4.04 | 4.07 | 4.07 | -0.03 |
| 1-Bromoundecane | 0.22 | 0.31 | 0.32 | -0.1 |
| 1-Butanethiol | 3.79 | 3.59 | 3.58 | 0.21 |
| 1-Butanol | 2.95 | 2.98 | 2.98 | -0.03 |
| 1-Butene | 5.23 | 5.11 | 5.09 | 0.14 |
| 1-Butylamine | 3.79 | 3.73 | 3.73 | 0.06 |
| 1-Butyne | 5.28 | 5.14 | 5.15 | 0.12 |
| 1-Chloro-1,1-difluoroethane | 5.54 | 5.59 | 5.61 | -0.07 |
| 1-Chloro-2-fluorobenzene | 3.11 | 2.96 | 3 | 0.11 |
| 1-Chloro-3-fluorobenzene | 3.25 | 2.96 | 2.94 | 0.31 |
| 1-Chloro-4-fluorobenzene | 3.43 | 2.96 | 2.95 | 0.48 |
| 1-Chlorobutane | 3.91 | 3.87 | 3.86 | 0.05 |
| 1-Chlorodecane | 1.02 | 1.05 | 1.06 | -0.04 |
| 1-Chlorodibenzo-p-dioxin | -1.92 | -2.58 | -2.61 | 0.69 |
| 1-Chlorododecane | -0.1 | 0.11 | 0.12 | -0.22 |
| 1-Chloroheptane | 2.58 | 2.46 | 2.47 | 0.11 |
| 1-Chlorohexane | 3.1 | 2.93 | 2.93 | 0.17 |
| 1-Chloronaphthalene | 0.58 | 0.36 | 0.33 | 0.25 |
| 1-Chlorononane | 1.54 | 1.52 | 1.54 | 0 |
| 1-Chlorooctane | 2.11 | 1.99 | 2.01 | 0.1 |
| 1-Chloropentadecane | -0.85 | -1.3 | -1.28 | 0.43 |
| 1-Chloropentane | 3.62 | 3.4 | 3.41 | 0.21 |
| 1-Chloropropane | 4.53 | 4.34 | 4.35 | 0.18 |
| 1-Chlorotridecane | -0.37 | -0.36 | -0.37 | 0 |
| 1-Chloroundecane | 0.47 | 0.58 | 0.59 | -0.12 |
| 1-Decene | 2.37 | 2.29 | 2.31 | 0.06 |
| 1-Decylazide | 0.63 | 0.41 | 0.36 | 0.27 |
| 1-Difluoromethoxy-1,1,2-trifluoroethane | 4.69 | 4.7 | 4.67 | 0.02 |
| 1-Dodecanol | -0.93 | -0.78 | -0.77 | -0.16 |
| 1-Dodecene | 1.42 | 1.35 | 1.37 | 0.05 |
| 1-Ethoxy-1,1,2,2,3,3,3-heptafluoropropane | 4.55 | 4.47 | 4.45 | 0.1 |
| 1-Ethoxy-1,1,2,2,3,3,4,4,4-nonafluorobutane | 4.13 | 4.1 | 4.13 | 0 |
| 1-Ethoxy-1,1,2,2,3,3,4,4,5,5,5-undecafluoropentane | 3.7 | 3.73 | 3.76 | -0.06 |
| 1-Ethoxy-1,1,2,2,3,4,4,4-octafluoro-3-trifluoromethylbutane | 3.71 | 3.75 | 3.73 | -0.02 |
| 1-Ethoxy-1,1,2,2-tetrafluoroethane | 4.46 | 4.53 | 4.56 | -0.1 |
| 1-Ethyl-1-methylcyclopentane | 3.41 | 3.53 | 3.5 | -0.09 |
| 1-Ethyl-2-isopropylbenzene | 2.03 | 1.83 | 1.81 | 0.22 |
| 1-Ethyl-3-isopropylbenzene | 2.03 | 1.83 | 1.83 | 0.2 |
| 1-Ethyl-4-isopropylbenzene | 1.94 | 1.83 | 1.83 | 0.11 |
| 1-Ethylnaphthalene | 0.41 | 0.27 | 0.25 | 0.16 |
| 1-Ethylpyrazole | 2.98 | 2.85 |  | 0.13 |
| 1-Ethylthiooctane | 1.08 | 0.94 | 0.95 | 0.13 |
| 1-Fluorobutane | 4.89 | 4.75 | 4.75 | 0.14 |
| 1-Fluorodecane | 1.93 | 1.93 | 1.94 | -0.01 |
| 1-Fluorohexane | 3.85 | 3.81 | 3.81 | 0.04 |
| 1-Fluorononane | 2.41 | 2.4 | 2.4 | 0.01 |
| 1-Fluorooctane | 2.9 | 2.87 | 2.85 | 0.05 |
| 1-Fluoropentane | 4.39 | 4.28 | 4.29 | 0.1 |
| 1-Fluoropropane | 5.43 | 5.22 | 5.2 | 0.23 |
| 1-Heneicosanol | -4.82 | -5.01 | -5.03 | 0.21 |
| 1-Heptadecanol | -3.16 | -3.13 | -3.14 | -0.02 |
| 1-Heptanethiol | 2.25 | 2.18 | 2.18 | 0.07 |
| 1-Heptanol | 1.46 | 1.57 | 1.58 | -0.12 |
| 1-Heptene | 3.87 | 3.7 | 3.72 | 0.15 |
| 1-Heptyne | 3.75 | 3.73 | 3.74 | 0 |
| 1-Hexadecanol | -2.62 | -2.66 | -2.65 | 0.03 |
| 1-Hexanethiol | 2.78 | 2.65 | 2.65 | 0.13 |
| 1-Hexanol | 2.09 | 2.04 | 2.04 | 0.05 |
| 1-Hexene | 4.18 | 4.17 | 4.18 | 0 |
| 1-Hexyne | 4.26 | 4.2 | 4.22 | 0.04 |
| 1H-Perfluorooctane | 3.34 | 3.53 | 3.57 | -0.23 |
| 1-Iodobutane | 3.26 | 3.13 | 3.12 | 0.14 |
| 1-Iododecane | 0.28 | 0.31 | 0.32 | -0.04 |
| 1-Iodododecane | -0.82 | -0.63 | -0.6 | -0.22 |
| 1-Iodoheptane | 1.78 | 1.72 | 1.72 | 0.06 |
| 1-Iodohexane | 2.28 | 2.19 | 2.19 | 0.09 |
| 1-Iodononane | 0.78 | 0.78 | 0.8 | -0.02 |
| 1-Iodooctane | 1.28 | 1.25 | 1.24 | 0.04 |
| 1-Iodopentane | 2.77 | 2.66 | 2.66 | 0.11 |
| 1-Iodoundecane | -0.35 | -0.16 | -0.13 | -0.22 |
| 1-Isobutylimidazole | 0.98 | 0.86 | 0.86 | 0.12 |
| 1-Isopropylimidazole | 1.23 | 1.38 | 1.45 | -0.22 |
| 1-Methoxy-2-propanol | 3.22 | 3 | 2.98 | 0.24 |
| 1-Methyl-1H-pyrazole | 3.18 | 3.26 |  | -0.08 |
| 1-Methyl-3-phenoxybenzene | -0.01 | -0.02 | -0.04 | 0.03 |
| 1-Methyl-4-benzylbenzene | -0.14 | -0.13 | -0.18 | 0.04 |
| 1-Methyl-4-isopropylcyclohexene | 2.26 | 1.82 | 1.8 | 0.46 |
| 1-Methyl-4-vinylcyclohexene | 2.76 | 2.2 | 2.17 | 0.59 |
| 1-Methylfluorene | -1.15 | -1.83 | -1.76 | 0.61 |
| 1-Methylnaphthalene | 0.97 | 0.74 | 0.75 | 0.22 |
| 1-Methylphenanthrene | -1.75 | -1.76 | -1.82 | 0.08 |
| 1-Methylpiperazine | 2.97 | 3.13 | 3.19 | -0.22 |
| 1-Naphthylamine | -0.77 | -0.95 | -0.99 | 0.22 |
| 1-Nitro-2,6-diisopropylbenzene | 0.1 | -0.42 | -0.45 | 0.55 |
| 1-Nitro-2-isopropylbenzene | 0.8 | 0.52 | 0.51 | 0.29 |
| 1-Nitrobutane | 2.71 | 2.7 | 2.77 | -0.06 |
| 1-Nitronaphthalene | -0.7 | -1.04 | -1.08 | 0.39 |
| 1-Nitropentane | 2.27 | 2.23 | 2.22 | 0.05 |
| 1-Nitropropane | 3.37 | 3.17 | 3.13 | 0.24 |
| 1-Nitropyrene | -6.23 | -5.68 | -5.66 | -0.57 |
| 1-Nonadecanol | -3.96 | -4.07 | -4.07 | 0.11 |
| 1-Nonanol | 0.5 | 0.63 | 0.64 | -0.14 |
| 1-Nonene | 2.87 | 2.76 | 2.78 | 0.09 |
| 1-Nonyne | 2.69 | 2.79 | 2.8 | -0.11 |
| 1-Octadecanol | -3.55 | -3.6 | -3.6 | 0.05 |
| 1-Octanethiol | 1.79 | 1.71 | 1.7 | 0.09 |
| 1-Octanol | 1.06 | 1.1 | 1.12 | -0.06 |
| 1-Octyne | 3.24 | 3.26 | 3.28 | -0.04 |
| 1-Pentadecanol | -2.23 | -2.19 | -2.2 | -0.03 |
| 1-Pentadecene | -0.11 | -0.06 | -0.05 | -0.06 |
| 1-Pentanethiol | 3.27 | 3.12 | 3.12 | 0.14 |
| 1-Pentanol | 2.52 | 2.51 | 2.52 | 0 |
| 1-Pentene | 4.72 | 4.64 | 4.66 | 0.06 |
| 1-Pentyne | 4.76 | 4.67 | 4.68 | 0.08 |
| 1-Phenyldodecane | -1.74 | -1.93 | -1.95 | 0.21 |
| 1-Phenylimidazole | -0.39 | -0.3 |  | -0.09 |
| 1-Phenylnaphthalene | -2.5 | -1.9 | -1.93 | -0.57 |
| 1-Piperazineethanamine | 0.91 | 1.51 | 1.47 | -0.56 |
| 1-Propanethiol | 4.11 | 4.06 | 4.06 | 0.05 |
| 1-Propanol | 3.45 | 3.45 | 3.44 | 0.01 |
| 1-Propoxy-2-propanol | 2.37 | 2.25 | 2.25 | 0.12 |
| 1-Propylamine | 4.32 | 4.2 | 4.21 | 0.11 |
| 1-Pyrenecarboxaldehyde | -5.27 | -4.94 | -4.98 | -0.28 |
| 1-s-Butylimidazole | 0.95 | 0.91 | 0.85 | 0.1 |
| 1-t-Butyl-4-ethylbenzene | 1.28 | 1.51 | 1.53 | -0.25 |
| 1-t-Butylimidazole | 1.13 | 1.23 | 1.29 | -0.16 |
| 1-Tetradecene | 0.37 | 0.41 | 0.41 | -0.04 |
| 1-Tetradecylamine | -0.52 | -0.97 | -0.96 | 0.44 |
| 1-trans-5-trans-9-cis-Cyclododecatriene | 1.07 | 0.56 | 0.5 | 0.57 |
| 1-Tridecanol | -1.37 | -1.25 | -1.27 | -0.1 |
| 1-Tridecene | 0.95 | 0.88 | 0.87 | 0.08 |
| 1-Undecanol | -0.38 | -0.31 | -0.31 | -0.07 |
| 1-Undecene | 2.01 | 1.82 | 1.84 | 0.17 |
| 2,2,2-Trifluoroethanol | 3.98 | 4.01 | 4.01 | -0.03 |
| 2,2',3,3',4,4',5,5',6-Nonachlorobiphenyl | -4.97 | -5.16 | -5.17 | 0.2 |
| 2,2',3,3',4,4',5,5',6-Nonachlorodiphenyl ether | -5.16 | -5.52 | -5.49 | 0.33 |
| 2,2',3,3',4,4',5,5'-Octachlorobiphenyl | -4.69 | -4.52 | -4.55 | -0.14 |
| 2,2',3,3',4,4',5,5'-Octachlorodiphenyl ether | -4.76 | -4.88 | -4.89 | 0.13 |
| 2,2',3,3',4,4',5,6,6'-Nonachlorobiphenyl | -4.5 | -5.16 | -5.21 | 0.71 |
| 2,2',3,3',4,4',5,6'-Octachlorobiphenyl | -4.46 | -4.52 | -4.54 | 0.08 |
| 2,2',3,3',4,4',5,6-Octachlorobiphenyl | -4.66 | -4.52 | -4.51 | -0.15 |
| 2,2',3,3',4,4',5,6'-Octachlorodiphenyl ether | -5.05 | -4.88 | -4.92 | -0.13 |
| 2,2',3,3',4,4',5-Heptachlorobiphenyl | -4.07 | -3.88 | -3.93 | -0.14 |
| 2,2',3,3',4,4',6,6'-Octachlorobiphenyl | -4.04 | -4.52 | -4.49 | 0.45 |
| 2,2',3,3',4,4',6,6'-Octachlorodiphenyl ether | -4.76 | -4.88 | -4.92 | 0.16 |
| 2,2',3,3',4,4',6-Heptachlorobiphenyl | -3.73 | -3.88 | -3.88 | 0.15 |
| 2,2',3,3',4,4'-Hexachlorobiphenyl | -3.45 | -3.24 | -3.27 | -0.17 |
| 2,2',3,3',4,4'-Hexachlorodiphenyl ether | -4.06 | -3.6 | -3.61 | -0.45 |
| 2,2',3,3',4,5,5',6,6'-Nonachlorobiphenyl | -5.42 | -5.16 | -5.12 | -0.3 |
| 2,2',3,3',4,5,5',6'-Octachlorobiphenyl | -4.3 | -4.52 | -4.57 | 0.27 |
| 2,2',3,3',4,5,5'-Heptachlorobiphenyl | -3.85 | -3.88 | -3.89 | 0.04 |
| 2,2',3,3',4,5,6,6'-Octachlorobiphenyl | -4.4 | -4.52 | -4.55 | 0.15 |
| 2,2',3,3',4,5',6,6'-Octachlorobiphenyl | -4.23 | -4.52 | -4.53 | 0.3 |
| 2,2',3,3',4,5,6'-Heptachlorobiphenyl | -3.92 | -3.88 | -3.88 | -0.04 |
| 2,2',3,3',4,5',6'-Heptachlorobiphenyl | -3.86 | -3.88 | -3.9 | 0.04 |
| 2,2',3,3',4,5,6-Heptachlorobiphenyl | -4.26 | -3.88 | -3.9 | -0.36 |
| 2,2',3,3',4,5',6-Heptachlorobiphenyl | -3.4 | -3.88 | -3.93 | 0.53 |
| 2,2',3,3',4,5'-Hexachlorobiphenyl | -3.27 | -3.24 | -3.23 | -0.04 |
| 2,2',3,3',4,5-Hexachlorobiphenyl | -3.24 | -3.24 | -3.26 | 0.02 |
| 2,2',3,3',4,6,6'-Heptachlorobiphenyl | -3.38 | -3.88 | -3.93 | 0.55 |
| 2,2',3,3',4,6'-Hexachlorobiphenyl | -3.25 | -3.24 | -3.25 | 0 |
| 2,2',3,3',4,6-Hexachlorobiphenyl | -3.16 | -3.24 | -3.23 | 0.07 |
| 2,2',3,3',4-Pentabromodiphenyl ether | -4.32 | -4.41 | -4.43 | 0.11 |
| 2,2',3,3',4-Pentachlorobiphenyl | -2.7 | -2.6 | -2.6 | -0.1 |
| 2,2',3,3',5,5',6,6'-Octachlorobiphenyl | -4.54 | -4.52 | -4.53 | -0.01 |
| 2,2',3,3',5,5',6-Heptachlorobiphenyl | -3.34 | -3.88 | -3.88 | 0.54 |
| 2,2',3,3',5,5'-Hexachlorobiphenyl | -3.1 | -3.24 | -3.27 | 0.17 |
| 2,2',3,3',5,6,6'-Heptachlorobiphenyl | -3.3 | -3.88 | -3.9 | 0.6 |
| 2,2',3,3',5,6'-Hexachlorobiphenyl | -3.13 | -3.24 | -3.26 | 0.13 |
| 2,2',3,3',5,6-Hexachlorobiphenyl | -3.32 | -3.24 | -3.25 | -0.07 |
| 2,2',3,3',5-Pentachlorobiphenyl | -2.52 | -2.6 | -2.65 | 0.13 |
| 2,2',3,3',6,6'-Hexachlorobiphenyl | -3.28 | -3.24 | -3.23 | -0.05 |
| 2,2',3,3',6-Pentachlorobiphenyl | -2.43 | -2.6 | -2.65 | 0.22 |
| 2,2',3,3'-Tetrachlorobiphenyl | -2.01 | -1.96 | -1.97 | -0.04 |
| 2,2,3,3-Tetramethylhexane | 2.73 | 2.94 | 2.99 | -0.26 |
| 2,2,3,3-Tetramethylpentane | 3.12 | 3.41 | 3.44 | -0.32 |
| 2,2',3,4,4',5,5',6-Octachlorobiphenyl | -4.46 | -4.52 | -4.55 | 0.09 |
| 2,2',3,4,4',5,5'-Heptachlorobiphenyl | -4.02 | -3.88 | -3.9 | -0.12 |
| 2,2',3,4,4',5,6,6'-Octachlorobiphenyl | -3.86 | -4.52 | -4.57 | 0.71 |
| 2,2',3,4,4',5,6-Heptachlorobiphenyl | -3.54 | -3.88 | -3.87 | 0.34 |
| 2,2',3,4,4',5',6-Heptachlorobiphenyl | -3.7 | -3.88 | -3.86 | 0.16 |
| 2,2',3,4,4',5,6'-Heptachlorobiphenyl | -3.67 | -3.88 | -3.9 | 0.23 |
| 2,2',3,4,4',5,6'-Heptachlorodiphenyl ether | -4 | -4.24 | -4.28 | 0.28 |
| 2,2',3,4,4',5'-Hexachlorobiphenyl | -3.34 | -3.24 | -3.25 | -0.09 |
| 2,2',3,4,4',5-Hexachlorobiphenyl | -3.42 | -3.24 | -3.29 | -0.13 |
| 2,2',3,4,4',5'-Hexachlorodiphenyl ether | -3.77 | -3.6 | -3.57 | -0.2 |
| 2,2',3,4,4',5-Hexachlorodiphenyl ether | -3.7 | -3.6 | -3.59 | -0.11 |
| 2,2',3,4,4',6,6'-Heptachlorodiphenyl ether | -3.88 | -4.24 | -4.27 | 0.39 |
| 2,2',3,4,4',6'-Hexachlorobiphenyl | -2.9 | -3.24 | -3.25 | 0.35 |
| 2,2',3,4,4',6-Hexachlorobiphenyl | -2.9 | -3.24 | -3.26 | 0.36 |
| 2,2',3,4,4',6'-Hexachlorodiphenyl ether | -3.57 | -3.6 | -3.57 | 0 |
| 2,2',3,4,4'-Pentabromodiphenyl ether | -4.55 | -4.41 | -4.4 | -0.15 |
| 2,2',3,4,4'-Pentachlorobiphenyl | -2.63 | -2.6 | -2.61 | -0.02 |
| 2,2',3,4,4'-Pentachlorodiphenyl ether | -3.16 | -2.96 | -3 | -0.16 |
| 2,2',3,4,5,5',6-Heptabromodiphenyl ether | -6.33 | -6.27 | -6.39 | 0.06 |
| 2,2',3,4,5,5',6-Heptachlorobiphenyl | -4.32 | -3.88 | -3.89 | -0.43 |
| 2,2',3,4',5,5',6-Heptachlorobiphenyl | -3.52 | -3.88 | -3.88 | 0.36 |
| 2,2',3,4,5,5'-Hexachlorobiphenyl | -3.3 | -3.24 | -3.24 | -0.06 |
| 2,2',3,4',5,5'-Hexachlorobiphenyl | -3.14 | -3.24 | -3.27 | 0.13 |
| 2,2',3,4,5,6,6'-Heptachlorobiphenyl | -3.33 | -3.88 | -3.9 | 0.57 |
| 2,2',3,4,5,6'-Hexachlorobiphenyl | -3.13 | -3.24 | -3.27 | 0.14 |
| 2,2',3,4',5,6'-Hexachlorobiphenyl | -2.72 | -3.24 | -3.26 | 0.54 |
| 2,2',3,4,5,6-Hexachlorobiphenyl | -3.53 | -3.24 | -3.26 | -0.27 |
| 2,2',3,4',5,6-Hexachlorobiphenyl | -3.95 | -3.24 | -3.26 | -0.69 |
| 2,2',3,4,5',6-Hexachlorobiphenyl | -2.78 | -3.24 | -3.23 | 0.45 |
| 2,2',3,4',5',6-Hexachlorobiphenyl | -3.07 | -3.24 | -3.25 | 0.18 |
| 2,2',3,4,5-Pentachlorobiphenyl | -2.54 | -2.6 | -2.61 | 0.07 |
| 2,2',3,4',5-Pentachlorobiphenyl | -2.6 | -2.6 | -2.61 | 0.01 |
| 2,2',3,4,5'-Pentachlorobiphenyl | -2.65 | -2.6 | -2.65 | 0 |
| 2,2',3,4,6-Pentachlorobiphenyl | -2.51 | -2.6 | -2.59 | 0.08 |
| 2,2',3,4',6-Pentachlorobiphenyl | -2.42 | -2.6 | -2.59 | 0.17 |
| 2,2',3,4,6'-Pentachlorobiphenyl | -2.28 | -2.6 | -2.65 | 0.37 |
| 2,2',3,4',6'-Pentachlorobiphenyl | -2.21 | -2.6 | -2.65 | 0.44 |
| 2,2',3,4'-Tetrachlorobiphenyl | -1.88 | -1.96 | -2.01 | 0.13 |
| 2,2',3,4-Tetrachlorobiphenyl | -1.91 | -1.96 | -2.01 | 0.1 |
| 2,2,3,4-Tetramethylpentane | 3.24 | 3.52 | 3.54 | -0.3 |
| 2,2',3,5,5',6-Hexachlorobiphenyl | -2.72 | -3.24 | -3.24 | 0.52 |
| 2,2',3,5,5'-Pentachlorobiphenyl | -2.41 | -2.6 | -2.63 | 0.22 |
| 2,2',3,5',6-Pentachlorobiphenyl | -2.27 | -2.6 | -2.6 | 0.33 |
| 2,2',3,5'-Tetrachlorobiphenyl | -1.9 | -1.96 | -1.97 | 0.07 |
| 2,2',3,5-Tetrachlorobiphenyl | -1.74 | -1.96 | -1.98 | 0.24 |
| 2,2',3,6'-Tetrachlorobiphenyl | -1.81 | -1.96 | -1.98 | 0.17 |
| 2,2',3,6-Tetrachlorobiphenyl | -1.65 | -1.96 | -1.97 | 0.32 |
| 2,2',3-Trichlorobiphenyl | -1.37 | -1.32 | -1.37 | 0 |
| 2,2,3-Trimethylpentane | 3.63 | 3.73 | 3.74 | -0.11 |
| 2,2',4,4',5,5'-Hexabromodiphenyl ether | -5.24 | -5.34 | -5.35 | 0.11 |
| 2,2',4,4',5,5'-Hexachlorobiphenyl | -3.23 | -3.24 | -3.29 | 0.06 |
| 2,2',4,4',5,5'-Hexachlorodiphenyl ether | -3.46 | -3.6 | -3.59 | 0.13 |
| 2,2',4,4',5,6'-Hexabromodiphenyl ether | -5.42 | -5.34 | -5.38 | -0.04 |
| 2,2',4,4',5,6'-Hexachlorobiphenyl | -2.77 | -3.24 | -3.24 | 0.47 |
| 2,2',4,4',5,6'-Hexachlorodiphenyl ether | -3.19 | -3.6 | -3.63 | 0.44 |
| 2,2',4,4',5-Pentabromodiphenyl ether | -4.3 | -4.41 | -4.42 | 0.12 |
| 2,2',4,4',5-Pentachlorobiphenyl | -2.54 | -2.6 | -2.62 | 0.08 |
| 2,2',4,4',5-Pentachlorodiphenyl ether | -2.87 | -2.96 | -3 | 0.13 |
| 2,2',4,4',6,6'-Hexabromobiphenyl | -5.1 | -4.98 | -5.03 | -0.06 |
| 2,2',4,4',6,6'-Hexachlorobiphenyl | -3.07 | -3.24 | -3.23 | 0.16 |
| 2,2',4,4',6-Pentachlorodiphenyl ether | -2.66 | -2.96 | -3.08 | 0.42 |
| 2,2',4,4'-Tetrabromodiphenyl ether | -3.6 | -3.48 | -3.57 | -0.03 |
| 2,2',4,4'-Tetrachlorobiphenyl | -1.94 | -1.96 | -1.97 | 0.03 |
| 2,2',4,4'-Tetrachlorodiphenyl ether | -2.28 | -2.32 | -2.29 | 0.01 |
| 2,2,4,4-Tetramethylpentane | 3.42 | 3.41 | 3.45 | -0.03 |
| 2,2',4,5,5'-PCB | -2.8 | -2.6 | -2.62 | -0.18 |
| 2,2',4,5,5'-Pentachlorodiphenyl ether | -2.76 | -2.96 | -3 | 0.24 |
| 2,2',4,5',6-Pentachlorobiphenyl | -2.21 | -2.6 | -2.63 | 0.42 |
| 2,2',4,5,6'-Pentachlorobiphenyl | -2.18 | -2.6 | -2.65 | 0.47 |
| 2,2',4,5'-Tetrachlorobiphenyl | -1.91 | -1.96 | -1.98 | 0.07 |
| 2,2',4,5-Tetrachlorobiphenyl | -1.94 | -1.96 | -1.95 | 0.01 |
| 2,2',4,6,6'-Pentachlorobiphenyl | -2.36 | -2.6 | -2.6 | 0.24 |
| 2,2',4,6'-Tetrachlorobiphenyl | -1.58 | -1.96 | -2.01 | 0.43 |
| 2,2',4,6-Tetrachlorobiphenyl | -1.36 | -1.96 | -1.97 | 0.61 |
| 2,2',4-Tribromodiphenyl ether | -2.66 | -2.55 | -2.55 | -0.11 |
| 2,2',4-Trichlorobiphenyl | -1.48 | -1.32 | -1.35 | -0.12 |
| 2,2,4-Trimethyl-4-methoxypentane | 2.87 | 3 | 3.05 | -0.18 |
| 2,2,4-Trimethylhexane | 3.32 | 3.26 | 3.28 | 0.04 |
| 2,2',5,5'-Tetrachlorobiphenyl | -1.9 | -1.96 | -1.98 | 0.08 |
| 2,2,5,5-Tetramethylhexane | 3.07 | 2.94 | 3.01 | 0.06 |
| 2,2',5,6'-Tetrachlorobiphenyl | -2.31 | -1.96 | -1.98 | -0.33 |
| 2,2',5-Trichlorobiphenyl | -1.22 | -1.32 | -1.33 | 0.11 |
| 2,2,5-Trimethylhexane | 3.34 | 3.26 | 3.28 | 0.06 |
| 2,2',6-Trichlorobiphenyl | -1.28 | -1.32 | -1.37 | 0.09 |
| 2,2’-Diaminodiethylamine | 1.24 | 1.67 | 1.73 | -0.49 |
| 2,2-Dichloro-1,1,1-trifluoroethane | 4.95 | 4.44 | 4.41 | 0.54 |
| 2,2'-Dichlorobiphenyl | -0.49 | -0.68 | -0.67 | 0.18 |
| 2,2'-Dichlorodiisopropyl ether | 2.02 | 2.03 | 2.04 | -0.02 |
| 2,2-Dimethyl-3-ethylpentane | 3.18 | 3.26 | 3.28 | -0.1 |
| 2,2-Dimethylheptane | 3.2 | 3 | 3.01 | 0.19 |
| 2,2-Dimethylhexane | 3.66 | 3.47 | 3.5 | 0.16 |
| 2,2-Dimethyloctane | 2.69 | 2.53 | 2.55 | 0.14 |
| 2,2-Dimethylpentane | 4.14 | 3.94 | 3.97 | 0.17 |
| 2,2-Dimethylpropane | 5.23 | 4.88 | 4.91 | 0.32 |
| 2,3,3',4,4',5,5',6-Octachlorobiphenyl | -4.6 | -4.52 | -4.57 | -0.03 |
| 2,3,3',4,4',5,5'-Heptachlorobiphenyl | -4.32 | -3.88 | -3.87 | -0.45 |
| 2',3,3',4,4',5,6-Heptabromodiphenyl ether | -6.24 | -6.27 | -6.28 | 0.04 |
| 2,3,3',4,4',5,6-Heptachlorobiphenyl | -4.29 | -3.88 | -3.93 | -0.36 |
| 2,3,3',4,4',5',6-Heptachlorobiphenyl | -3.98 | -3.88 | -3.9 | -0.08 |
| 2,3,3',4,4',5-Hexabromodiphenyl ether | -5.03 | -5.34 | -5.45 | 0.43 |
| 2,3,3',4,4',5'-Hexachlorobiphenyl | -3.7 | -3.24 | -3.25 | -0.45 |
| 2,3,3',4,4',5-Hexachlorobiphenyl | -3.68 | -3.24 | -3.25 | -0.43 |
| 2,3,3',4,4',6-Hexachlorobiphenyl | -3.21 | -3.24 | -3.24 | 0.03 |
| 2,3,3',4,4'-Pentachlorobiphenyl | -3.06 | -2.6 | -2.63 | -0.43 |
| 2,3,3',4,4'-Pentachlorodiphenyl ether | -3.29 | -2.96 | -2.97 | -0.32 |
| 2,3,3',4,5,5',6-Heptachlorobiphenyl | -4.04 | -3.88 | -3.93 | -0.11 |
| 2,3,3',4',5,5',6-Heptachlorobiphenyl | -3.72 | -3.88 | -3.93 | 0.21 |
| 2,3,3',4,5,5'-Hexachlorobiphenyl | -2.92 | -3.24 | -3.23 | 0.31 |
| 2,3,3',4',5,5'-Hexachlorobiphenyl | -2.86 | -3.24 | -3.23 | 0.37 |
| 2,3,3',4,5,6-Hexachlorobiphenyl | -3.57 | -3.24 | -3.29 | -0.28 |
| 2,3,3',4',5,6-Hexachlorobiphenyl | -3.48 | -3.24 | -3.25 | -0.23 |
| 2,3,3',4,5',6-Hexachlorobiphenyl | -2.86 | -3.24 | -3.26 | 0.4 |
| 2,3,3',4',5',6-Hexachlorobiphenyl | -3.35 | -3.24 | -3.29 | -0.06 |
| 2,3,3',4',5'-Pentachlorobiphenyl | -3.11 | -2.6 | -2.59 | -0.52 |
| 2,3,3',4,5-Pentachlorobiphenyl | -2.86 | -2.6 | -2.6 | -0.26 |
| 2,3,3',4',5-Pentachlorobiphenyl | -2.98 | -2.6 | -2.6 | -0.38 |
| 2,3,3',4,5'-Pentachlorobiphenyl | -2.99 | -2.6 | -2.61 | -0.38 |
| 2,3,3',4',6-Pentachlorobiphenyl | -2.74 | -2.6 | -2.63 | -0.11 |
| 2,3,3',4'-Tetrachlorobiphenyl | -2.29 | -1.96 | -1.98 | -0.31 |
| 2,3,3,4-Tetramethylpentane | 3.07 | 3.52 | 3.55 | -0.48 |
| 2,3,3',5,5',6-Hexachlorobiphenyl | -2.89 | -3.24 | -3.24 | 0.35 |
| 2,3,3',5,5'-Pentachlorobiphenyl | -2.81 | -2.6 | -2.63 | -0.18 |
| 2,3,3',5,6-Pentachlorobiphenyl | -2.5 | -2.6 | -2.62 | 0.12 |
| 2,3,3',5',6-Pentachlorobiphenyl | -2.62 | -2.6 | -2.61 | -0.01 |
| 2,3,3',5-Tetrachlorobiphenyl | -2.12 | -1.96 | -1.98 | -0.14 |
| 2,3,3',6-Tetrachlorobiphenyl | -1.81 | -1.96 | -1.97 | 0.16 |
| 2,3,3'-Trichlorobiphenyl | -1.48 | -1.32 | -1.37 | -0.11 |
| 2,3,3-Trimethyl-1-butene | 4.19 | 4.31 | 4.32 | -0.13 |
| 2,3,3-Trimethylhexane | 3.18 | 3.26 | 3.29 | -0.11 |
| 2,3,3-Trimethylpentane | 3.56 | 3.73 | 3.75 | -0.19 |
| 2,3',4,4',5,5'-Hexachlorobiphenyl | -3.55 | -3.24 | -3.29 | -0.26 |
| 2,3',4,4',5,5'-Hexachlorodiphenyl ether | -3.64 | -3.6 | -3.61 | -0.03 |
| 2,3,4,4',5,6-Hexachlorobiphenyl | -2.93 | -3.24 | -3.29 | 0.36 |
| 2,3',4,4',5',6-Hexachlorobiphenyl | -3.27 | -3.24 | -3.26 | -0.01 |
| 2,3',4,4',5'-Pentachlorobiphenyl | -2.88 | -2.6 | -2.61 | -0.27 |
| 2,3,4,4',5-Pentachlorobiphenyl | -2.9 | -2.6 | -2.59 | -0.31 |
| 2,3',4,4',5-Pentachlorobiphenyl | -2.77 | -2.6 | -2.65 | -0.12 |
| 2,3',4,4',6-Pentabromodiphenyl ether | -4.66 | -4.41 | -4.51 | -0.15 |
| 2,3,4,4',6-Pentachlorobiphenyl | -2.65 | -2.6 | -2.65 | 0 |
| 2,3',4,4',6-Pentachlorobiphenyl | -2.54 | -2.6 | -2.61 | 0.07 |
| 2,3',4,4'-Tetrabromodiphenyl ether | -3.72 | -3.48 | -3.49 | -0.23 |
| 2,3',4,4'-Tetrachlorobiphenyl | -2.18 | -1.96 | -1.99 | -0.19 |
| 2,3',4,4'-Tetrachlorodiphenyl ether | -2.39 | -2.32 | -2.33 | -0.06 |
| 2,3',4,5,5'-Pentachlorobiphenyl | -2.85 | -2.6 | -2.65 | -0.2 |
| 2,3',4',5,5'-Pentachlorobiphenyl | -2.95 | -2.6 | -2.6 | -0.35 |
| 2,3,4,5,6-Pentabromodiphenyl ether | -4.3 | -4.41 | -4.51 | 0.21 |
| 2,3,4,5,6-Pentachlorobiphenyl | -2.62 | -2.6 | -2.61 | -0.01 |
| 2,3',4,5',6-Pentachlorobiphenyl | -2.43 | -2.6 | -2.62 | 0.19 |
| 2,3,4',5,6-Pentachlorobiphenyl | -2.59 | -2.6 | -2.63 | 0.04 |
| 2,3',4',5',6-Pentachlorobiphenyl | -2.73 | -2.6 | -2.59 | -0.14 |
| 2,3,4,5,6-Pentafluorotoluene | 3.38 | 3.74 | 3.81 | -0.44 |
| 2,3,4,5-Tetrachloroanisole | 0.08 | 0.49 | 0.52 | -0.44 |
| 2,3',4',5-Tetrachlorobiphenyl | -2.24 | -1.96 | -1.97 | -0.27 |
| 2,3',4,5'-Tetrachlorobiphenyl | -2.17 | -1.96 | -1.97 | -0.2 |
| 2,3',4',5'-Tetrachlorobiphenyl | -2.22 | -1.96 | -2.01 | -0.21 |
| 2,3,4,5-Tetrachlorobiphenyl | -2.23 | -1.96 | -1.99 | -0.24 |
| 2,3',4,5-Tetrachlorobiphenyl | -2.18 | -1.96 | -1.95 | -0.23 |
| 2,3,4',5-Tetrachlorobiphenyl | -2.17 | -1.96 | -1.98 | -0.19 |
| 2,3,4,6,7,8-Hexachlorodibenzofuran | -5.3 | -5.3 | -5.31 | 0.01 |
| 2,3',4,6-Tetrabromodiphenyl ether | -3.5 | -3.48 | -3.52 | 0.03 |
| 2,3',4',6-Tetrabromodiphenyl ether | -3.39 | -3.48 | -3.49 | 0.1 |
| 2,3,4,6-Tetrachlorobiphenyl | -1.78 | -1.96 | -1.98 | 0.2 |
| 2,3,4',6-Tetrachlorobiphenyl | -2.11 | -1.96 | -1.98 | -0.13 |
| 2,3',4',6-Tetrachlorobiphenyl | -2.02 | -1.96 | -1.99 | -0.03 |
| 2,3,4,6-Tetrachlorophenol | -0.25 | -0.81 | -0.83 | 0.58 |
| 2,3,4,7,8-Pentachlorodibenzofuran | -4.66 | -4.66 | -4.68 | 0.02 |
| 2',3,4-Tribromodiphenyl ether | -2.83 | -2.55 | -2.61 | -0.22 |
| 2,3',4-Tribromodiphenyl ether | -2.7 | -2.55 | -2.63 | -0.07 |
| 2,3',4-Trichlorobiphenyl | -1.43 | -1.32 | -1.33 | -0.1 |
| 2,3,4'-Trichlorobiphenyl | -1.55 | -1.32 | -1.33 | -0.22 |
| 2,3',4'-Trichlorobiphenyl | -1.53 | -1.32 | -1.34 | -0.19 |
| 2,3,4-Trichlorobiphenyl | -1.53 | -1.32 | -1.31 | -0.22 |
| 2,3,4-Trichlorophenol | 0 | -0.17 | -0.19 | 0.19 |
| 2,3,4-Trimethylpentane | 3.58 | 3.84 | 3.82 | -0.24 |
| 2,3',5,5'-Tetrachlorobiphenyl | -2.12 | -1.96 | -1.99 | -0.13 |
| 2,3,5,6-Tetrachlorobiphenyl | -2.33 | -1.96 | -1.97 | -0.36 |
| 2,3',5'-Trichlorobiphenyl | -1.35 | -1.32 | -1.32 | -0.03 |
| 2,3,5-Trichlorobiphenyl | -1.4 | -1.32 | -1.32 | -0.08 |
| 2,3',5-Trichlorobiphenyl | -1.44 | -1.32 | -1.34 | -0.1 |
| 2,3,6-Trichlorobiphenyl | -1.15 | -1.32 | -1.34 | 0.19 |
| 2,3',6-Trichlorobiphenyl | -1.31 | -1.32 | -1.34 | 0.03 |
| 2,3,7,8-Tetrachlorodibenzofuran | -3.91 | -4.02 | -4 | 0.09 |
| 2,3,7-Trichlorodibenzo-p-dioxin | -3.67 | -3.86 | -3.87 | 0.2 |
| 2,3,8-Trichlorodibenzofuran | -3.04 | -3.38 | -3.4 | 0.36 |
| 2,3-Butandione | 3.88 | 3.38 | 3.36 | 0.52 |
| 2,3-Butanediol dinitrate | 2.03 | 1.68 | 1.69 | 0.34 |
| 2,3-Butyleneglycol | 1.39 | 1.32 | 1.28 | 0.1 |
| 2,3'-Dichlorobiphenyl | -0.78 | -0.68 | -0.69 | -0.09 |
| 2,3-Dichlorobiphenyl | -0.79 | -0.68 | -0.71 | -0.08 |
| 2,3-Dichlorobutane | 3.51 | 3.44 | 3.49 | 0.02 |
| 2,3-Dichlorodibenzo-p-dioxin | -3.41 | -3.22 | -3.16 | -0.25 |
| 2,3-Dichloronaphthalene | -0.48 | -0.28 | -0.33 | -0.15 |
| 2,3-Dichloropropene | 3.91 | 3.7 | 3.69 | 0.22 |
| 2,3-Dichlorotoluene | 1.75 | 1.96 | 1.96 | -0.21 |
| 2,3-Dimethyl-1,3-butadiene | 4.31 | 4.74 | 4.81 | -0.51 |
| 2,3-Dimethyl-1-butene | 4.53 | 4.63 | 4.64 | -0.11 |
| 2,3-Dimethyl-1-hexene | 3.57 | 3.69 | 3.72 | -0.15 |
| 2,3-Dimethyl-1-pentene | 4.03 | 4.16 | 4.17 | -0.14 |
| 2,3-Dimethyl-2-butanol | 2.63 | 3.09 | 3.14 | -0.51 |
| 2,3-Dimethyl-2-pentene | 3.82 | 4.13 | 4.09 | -0.27 |
| 2,3-Dimethylbutane | 4.51 | 4.52 | 4.53 | -0.02 |
| 2,3-Dimethylhexane | 3.54 | 3.58 | 3.58 | -0.04 |
| 2,3-Dimethylpentane | 3.96 | 4.05 | 4.06 | -0.1 |
| 2,3-Lutidine | 2.55 | 2.76 | 2.78 | -0.23 |
| 2,3-Pentadiene | 4.63 | 4.64 |  | -0.01 |
| 2,3-Xylenol | 0.55 | 1.23 | 1.23 | -0.68 |
| 2,4,4',5-Tetrachlorobiphenyl | -2.14 | -1.96 | -1.97 | -0.17 |
| 2,4,4',5-Tetrachlorodiphenyl ether | -2.32 | -2.32 | -2.36 | 0.04 |
| 2,4,4',6-Tetrabromodiphenyl ether | -3.41 | -3.48 | -3.49 | 0.08 |
| 2,4,4'-Tribromodiphenyl ether | -2.8 | -2.59 | -2.61 | -0.19 |
| 2,4,4'-Trichlorobiphenyl | -1.47 | -1.32 | -1.34 | -0.13 |
| 2,4,4'-Trichlorodiphenyl ether | -1.69 | -1.68 | -1.72 | 0.03 |
| 2,4,4-Trimethyl-2-pentene | 3.7 | 3.87 | 3.88 | -0.18 |
| 2,4,4-Trimethylhexane | 3.25 | 3.26 | 3.29 | -0.04 |
| 2,4,5-T | -2.2 | -2.01 | -2.01 | -0.19 |
| 2,4,5-Trichlorobiphenyl | -1.35 | -1.32 | -1.37 | 0.02 |
| 2,4',5-Trichlorobiphenyl | -1.46 | -1.32 | -1.34 | -0.12 |
| 2,4,5-Trichlorodiphenyl ether | -1.54 | -1.68 | -1.69 | 0.15 |
| 2,4',5-Trichlorodiphenyl ether | -1.64 | -1.68 | -1.72 | 0.08 |
| 2,4,5-Trichlorophenol | 0.43 | -0.17 | -0.19 | 0.62 |
| 2,4,6-Collidine | 2.43 | 2.55 | 2.65 | -0.22 |
| 2,4,6-Tribromodiphenyl ether | -2.4 | -2.55 | -2.59 | 0.19 |
| 2,4',6-Tribromodiphenyl ether | -2.72 | -2.55 | -2.55 | -0.17 |
| 2,4,6-Tribromophenol | -0.74 | -1.04 | -1.08 | 0.34 |
| 2,4,6-Trichloroanisole | 0.82 | 1.13 | 1.12 | -0.3 |
| 2,4,6-Trichlorobiphenyl | -1.38 | -1.32 | -1.34 | -0.04 |
| 2,4',6-Trichlorobiphenyl | -1.24 | -1.32 | -1.35 | 0.11 |
| 2,4,6-Trichlorodibenzofuran | -2.88 | -3.38 | -3.36 | 0.48 |
| 2,4,6-Trichlorophenol | 0.02 | -0.17 | -0.19 | 0.21 |
| 2,4,6-Tri-t-butylnitrobenzene | -2.53 | -2.32 | -2.26 | -0.27 |
| 2,4,8-Trichlorodibenzofuran | -2.86 | -3.38 | -3.34 | 0.48 |
| 2,4'-Dibromodiphenyl ether | -1.91 | -1.62 | -1.63 | -0.28 |
| 2,4-Dibromodiphenyl ether | -1.82 | -1.62 | -1.61 | -0.2 |
| 2,4'-Dichlorobiphenyl | -0.78 | -0.68 | -0.7 | -0.08 |
| 2,4-Dichlorobiphenyl | -0.76 | -0.68 | -0.71 | -0.05 |
| 2,4-Dichlorodiphenyl ether | -0.91 | -1.04 | -1.05 | 0.14 |
| 2,4-Dichlorophenoxyacetic acid | -1.96 | -1.37 | -1.36 | -0.6 |
| 2,4-Dichlorotoluene | 1.86 | 1.96 | 1.96 | -0.1 |
| 2,4-Dimethyl-1-pentene | 4.1 | 4.16 | 4.2 | -0.1 |
| 2,4-Dimethyl-2-pentene | 4.05 | 4.19 | 4.19 | -0.14 |
| 2,4-Dimethyl-3-ethylpentane | 3.13 | 3.37 | 3.4 | -0.27 |
| 2,4-Dimethyl-3-pentanone | 3.26 | 3.27 | 3.24 | 0.02 |
| 2,4-Dimethylhexane | 3.61 | 3.58 | 3.59 | 0.02 |
| 2,4-Dimethylpentane | 4.12 | 4.05 | 4.04 | 0.08 |
| 2,4-Dinitrophenol | -2.26 | -2.33 | -2.36 | 0.1 |
| 2,4-Di-t-butylphenol | -0.31 | -0.77 | -0.74 | 0.43 |
| 2,4-Lutidine | 2.62 | 2.76 | 2.8 | -0.18 |
| 2,4-Xylenol | 1.11 | 1.23 | 1.26 | -0.15 |
| 2,5-Aldehydine | 2.3 | 2.29 | 2.33 | -0.03 |
| 2,5-Dichlorobiphenyl | -0.75 | -0.68 | -0.7 | -0.04 |
| 2,5-Dichlorotoluene | 1.85 | 1.96 | 1.96 | -0.11 |
| 2,5-Dimethyl-1,5-hexadiene | 3.34 | 3.8 | 3.87 | -0.53 |
| 2,5-Dimethylhexane | 3.61 | 3.58 | 3.61 | 0 |
| 2,5-Dimethyltetrahydrofuran | 3.92 | 4.11 | 4.13 | -0.21 |
| 2,5-Dimethylthiophene | 3.07 | 3.1 | 3.16 | -0.09 |
| 2,5-Lutidine | 2.65 | 2.76 | 2.76 | -0.11 |
| 2,5-Xylenol | 1.35 | 1.23 | 1.17 | 0.18 |
| 2,5-Xylidine | 1.21 | 1.03 | 1.02 | 0.19 |
| 2,6-Dibromodiphenyl ether | -1.59 | -1.62 | -1.65 | 0.06 |
| 2,6-Dichlorobiphenyl | -0.54 | -0.68 | -0.7 | 0.16 |
| 2,6-Dichlorodiphenyl ether | -0.76 | -1.04 | -1.08 | 0.32 |
| 2,6-Dichloronaphthalene | -0.46 | -0.28 | -0.31 | -0.15 |
| 2,6-Dichlorophenol | 0.64 | 0.47 | 0.47 | 0.17 |
| 2,6-Dichlorosyringaldehyde | -1.6 | -1.73 | -1.81 | 0.21 |
| 2,6-Dichlorotoluene | 1.85 | 1.96 | 1.95 | -0.1 |
| 2,6-Diethylaniline | -0.3 | 0.09 | 0.12 | -0.42 |
| 2,6-Dimethyl-4-heptanol | 1.61 | 1.67 | 1.69 | -0.08 |
| 2,6-Dimethylheptan-4-one | 2.35 | 2.33 | 2.33 | 0.02 |
| 2,6-Dimethylheptane | 3.09 | 3.11 | 3.12 | -0.03 |
| 2,6-Dimethylnaphthalene | 0.31 | 0.48 | 0.48 | -0.17 |
| 2,6-Lutidine | 2.88 | 2.81 | 2.74 | 0.14 |
| 2,6-Xylenol | 1.33 | 1.23 | 1.27 | 0.06 |
| 2,6-Xylidine | 1.23 | 1.03 | 1 | 0.23 |
| 2,7-Dibromofluorene | -2.96 | -3.43 | -3.46 | 0.5 |
| 2,7-Dichloronaphthalene | -0.46 | -0.28 | -0.25 | -0.21 |
| 2,7-Diiodofluorene | -4.25 | -4.23 | -4.24 | -0.01 |
| 2,7-Dimethyloctane | 2.7 | 2.64 | 2.63 | 0.07 |
| 2,8-Dichlorodibenzo-p-dioxin | -3.85 | -3.22 | -3.23 | -0.62 |
| 2-Adamantanone | 0.22 | 0.06 | -0.04 | 0.26 |
| 2-Azidoacetonitrile | 2.46 | 2.97 | 3.19 | -0.73 |
| 2-Azidoethanol | 1.85 | 2.21 | 2.38 | -0.53 |
| 2-Azidoethoxyethane | 3.12 | 2.92 | 2.91 | 0.21 |
| 2-Bromo-7-chlorofluorene | -2.48 | -3.14 | -3.17 | 0.69 |
| 2-Bromo-7-iodofluorene | -3.6 | -3.83 | -3.82 | 0.22 |
| 2-Bromoadamantane | 0.52 | 0.39 | 0.35 | 0.17 |
| 2-Bromobutane | 3.9 | 3.81 | 3.81 | 0.09 |
| 2-Bromodiphenyl ether | -0.8 | -0.73 | -0.73 | -0.07 |
| 2-Bromofluorene | -1.75 | -2.5 | -2.51 | 0.77 |
| 2-Bromonaphthalene | -0.3 | 0.07 | 0.02 | -0.32 |
| 2-Bromopropane | 4.46 | 4.28 | 4.28 | 0.18 |
| 2-Bromotoluene | 2.27 | 2.31 | 2.32 | -0.05 |
| 2-Butanethiol | 4.03 | 3.9 | 3.92 | 0.11 |
| 2-Butanol | 3.41 | 3.5 | 3.52 | -0.11 |
| 2-Butanone | 4.12 | 4.16 | 4.16 | -0.04 |
| 2-Butyne | 4.97 | 4.9 | 4.91 | 0.06 |
| 2-Chloro-1,1,1,2-tetrafluoroethane | 5.62 | 5.37 | 5.27 | 0.35 |
| 2-Chloro-1,1,1-trifluoroethane | 5.31 | 4.9 | 4.9 | 0.41 |
| 2-Chloro-1,1,2-trifluoroethyl difluoromethyl ether | 4.46 | 4.29 | 4.28 | 0.18 |
| 2-Chloro-1,1,2-trifluoroethyl ethyl ether | 3.89 | 4.15 | 4.2 | -0.31 |
| 2-Chloro-1,1,2-trifluoroethyl propyl ether | 3.5 | 3.68 | 3.7 | -0.2 |
| 2-Chloro-1,1-difluoroethylene | 5.69 | 5.53 | 5.47 | 0.22 |
| 2-Chloroadamantane | 0.79 | 0.77 | 0.7 | 0.09 |
| 2-Chloroaniline | 1.43 | 0.91 | 0.91 | 0.52 |
| 2-Chlorobiphenyl | 0.05 | -0.04 | -0.09 | 0.14 |
| 2-Chlorobutane | 4.34 | 4.19 | 4.22 | 0.12 |
| 2-Chlorodiphenyl ether | -0.27 | -0.4 | -0.44 | 0.17 |
| 2-Chloroethanol | 2.98 | 2.85 | 2.84 | 0.14 |
| 2-Chloronaphthalene | 0.58 | 0.36 | 0.33 | 0.25 |
| 2-Chloronitrobenzene | 0.74 | 0.82 | 0.83 | -0.09 |
| 2-Chloropentane | 3.81 | 3.72 | 3.73 | 0.08 |
| 2-Chloropropane | 4.83 | 4.66 | 4.66 | 0.17 |
| 2-Chloropropanoic acid | 1.55 | 1.8 | 1.83 | -0.28 |
| 2-Chloropropene | 5.02 | 4.77 | 4.84 | 0.18 |
| 2-Chloropyridine | 2.47 | 2.34 | 2.12 | 0.35 |
| 2-Chlorosyringaldehyde | -1.1 | -1.09 | -1.17 | 0.07 |
| 2-Chlorotoluene | 2.67 | 2.6 | 2.59 | 0.08 |
| 2-cis-Decene | 2.23 | 2.32 | 2.33 | -0.1 |
| 2-cis-Dodecene | 1.21 | 1.38 | 1.39 | -0.18 |
| 2-Decanol | 0.54 | 0.68 | 0.69 | -0.15 |
| 2-Diethylaminoethanethiol | 2.47 | 2.42 | 2.43 | 0.04 |
| 2-Difluoromethoxy-1,1,1,3,3,3-hexafluoropropane | 4.3 | 4.55 | 4.86 | -0.56 |
| 2-Difluoromethoxy-1,1-difluoroethane | 4.48 | 4.55 | 4.5 | -0.02 |
| 2-Diisopropylaminoethanethiol | 1.79 | 2.1 | 2.2 | -0.41 |
| 2-Dimethylaminoethanethiol | 3.21 | 3.24 | 3.22 | -0.01 |
| 2-Dodecanol | -0.44 | -0.26 | -0.25 | -0.19 |
| 2-Ethoxy-1,1,1,3,3,3-hexafluoro-2-trifluoromethylpropane | 4.3 | 3.84 | 3.72 | 0.58 |
| 2-Ethoxyethanol | 2.87 | 2.67 | 2.64 | 0.23 |
| 2-Ethoxyethylacetate | 2.51 | 2.79 | 2.78 | -0.27 |
| 2-Ethyl-1-butanol | 2.31 | 2.3 | 2.3 | 0.01 |
| 2-Ethyl-1-butene | 4.37 | 4.37 | 4.41 | -0.04 |
| 2-Ethyl-1-hexanol | 1.28 | 1.36 | 1.36 | -0.08 |
| 2-Ethyl-1-pentene | 3.88 | 3.9 | 3.92 | -0.04 |
| 2-Ethylfuran | 3.89 | 3.35 | 3.34 | 0.55 |
| 2-Ethylhexyl acetate | 1.51 | 1.48 | 1.48 | 0.03 |
| 2-Ethylhexyl acrylate | 1.39 | 1.18 | 1.18 | 0.21 |
| 2-Ethyl-m-xylene | 2.13 | 2.25 | 2.25 | -0.12 |
| 2-Ethylnaphthalene | 0.41 | 0.27 | 0.23 | 0.18 |
| 2-Ethylnitrobenzene | 0.91 | 0.73 | 0.75 | 0.16 |
| 2-Ethyl-p-xylene | 2.1 | 2.25 | 2.26 | -0.16 |
| 2-Ethylpyridine | 2.82 | 2.55 | 2.5 | 0.32 |
| 2-Ethylthiophene | 3.06 | 3.03 | 3.03 | 0.03 |
| 2-Ethyltoluene | 2.53 | 2.51 | 2.54 | -0.01 |
| 2-Fluorenylaldehyde | -3.08 | -2.87 | -2.89 | -0.19 |
| 2-Fluoroiodobenzene | 2.1 | 2.27 | 2.27 | -0.17 |
| 2-Fluoronitrobenzene | 1.31 | 1.56 | 1.57 | -0.26 |
| 2-Heptanol | 2 | 2.09 | 2.08 | -0.08 |
| 2-Heptanone | 2.71 | 2.75 | 2.76 | -0.05 |
| 2-Hexanol | 2.52 | 2.56 | 2.54 | -0.02 |
| 2-Hexyne | 4.03 | 3.96 | 3.94 | 0.09 |
| 2-Hydroxy-4-methoxybenzaldehyde | 0.03 | 0 | -0.02 | 0.05 |
| 2-Hydroxy-5-methoxybenzaldehyde | 0.31 | -0.03 | -0.06 | 0.37 |
| 2-Hydroxy-6-methoxybenzaldehyde | -0.06 | 0 | 0.01 | -0.07 |
| 2-Imidazolidinone | -2.46 | -2.33 |  | -0.13 |
| 2-Iodofluorene | -2.39 | -2.9 | -2.98 | 0.59 |
| 2-Isopropylnaphthalene | -0.14 | 0.06 | 0.02 | -0.16 |
| 2-Isopropyltoluene | 2.32 | 2.3 | 2.28 | 0.04 |
| 2-Methoxyaniline | 1.05 | 1.1 | 1.09 | -0.04 |
| 2-Methoxyethylamine | 3.83 | 3.7 | 3.67 | 0.16 |
| 2-Methoxy-p-cresol | 0.5 | 1.04 | 1.07 | -0.57 |
| 2-Methoxyphenol | 1.14 | 1.3 | 1.3 | -0.16 |
| 2-Methyl-1,1-diphenylpropane | -0.55 | -0.76 | -0.78 | 0.23 |
| 2-Methyl-1,2-propanediamine | 3.12 | 3.15 | 3.18 | -0.06 |
| 2-Methyl-1-butanol | 2.62 | 2.77 | 2.77 | -0.15 |
| 2-Methyl-1-heptene | 3.44 | 3.43 | 3.45 | -0.01 |
| 2-Methyl-1-hexene | 3.91 | 3.9 | 3.89 | 0.02 |
| 2-Methyl-1-octene | 2.94 | 2.96 | 2.99 | -0.05 |
| 2-Methyl-1-pentanol | 2.38 | 2.3 | 2.3 | 0.08 |
| 2-Methyl-1-pentene | 4.41 | 4.37 | 4.35 | 0.06 |
| 2-Methyl-1-propanethiol | 3.97 | 3.85 | 3.84 | 0.13 |
| 2-Methyl-1-propanol | 3.21 | 3.24 | 3.25 | -0.04 |
| 2-Methyl-2-butanol | 3.35 | 3.3 | 3.31 | 0.04 |
| 2-Methyl-2-butenenitrile | 3.53 | 3.67 | 3.67 | -0.14 |
| 2-Methyl-2-pentanol | 2.93 | 2.83 | 2.78 | 0.15 |
| 2-Methyl-2-pentene | 4.32 | 4.4 | 4.39 | -0.07 |
| 2-Methyl-2-propanol | 3.74 | 3.77 | 3.8 | -0.06 |
| 2-Methyl-3-butenenitrile | 3.44 | 3.67 | 3.69 | -0.25 |
| 2-Methyl-3-pentanol | 2.86 | 2.82 | 2.84 | 0.02 |
| 2-Methylacrylonitrile | 3.98 | 4.11 | 4.07 | -0.09 |
| 2-Methylaminoethanol | 2.09 | 2.54 | 2.6 | -0.51 |
| 2-Methylanthracene | -1.78 | -1.76 | -1.82 | 0.04 |
| 2-Methylaziridine | 4.19 | 4.25 | 4.26 | -0.07 |
| 2-Methylbenzaldehyde | 1.8 | 1.94 | 1.9 | -0.1 |
| 2-Methyldecane | 1.92 | 1.91 | 1.92 | 0 |
| 2-Methylglutaric acid | -3 | -3.22 | -3.23 | 0.23 |
| 2-Methylheptane | 3.44 | 3.32 | 3.32 | 0.12 |
| 2-Methylhexane | 3.91 | 3.79 | 3.82 | 0.09 |
| 2-Methylnaphthalene | 0.86 | 0.74 | 0.71 | 0.15 |
| 2-Methylnonane | 2.4 | 2.38 | 2.38 | 0.02 |
| 2-Methyloctane | 2.93 | 2.85 | 2.88 | 0.05 |
| 2-Methylpentane | 4.45 | 4.26 | 4.28 | 0.17 |
| 2-Methylpropanal | 4.36 | 4.16 | 4.16 | 0.2 |
| 2-Methylpropane | 5.38 | 5.2 | 5.22 | 0.16 |
| 2-Methylpropanoic acid | 2.41 | 2.34 | 2.3 | 0.11 |
| 2-Methylpropylamine | 4.27 | 3.99 | 3.99 | 0.28 |
| 2-Methylpyrazine | 3.04 | 2.75 | 2.71 | 0.33 |
| 2-Methylstyrene | 2.38 | 2.68 | 2.66 | -0.28 |
| 2-Methyltetrahydrofuran | 4.37 | 4.34 | 4.32 | 0.05 |
| 2-Methylthiophene | 3.52 | 3.5 | 3.49 | 0.03 |
| 2-Nitroaniline | -1.14 | -0.49 | -0.39 | -0.75 |
| 2-Nitrobutane | 3.02 | 2.9 |  | 0.12 |
| 2-Nitro-m-xylene | 1.24 | 0.94 | 0.96 | 0.28 |
| 2-Nitropropane | 3.35 | 3.37 |  | -0.02 |
| 2-Nitro-t-butylbenzene | 0.68 | 0.2 | 0.19 | 0.49 |
| 2-Nitrotoluene | 1.29 | 1.2 | 1.19 | 0.1 |
| 2-Nonanol | 1.03 | 1.15 | 1.17 | -0.14 |
| 2-Nonanone | 1.78 | 1.81 | 1.8 | -0.02 |
| 2-n-Propylphenol | 1.07 | 0.55 | 0.56 | 0.51 |
| 2-n-Propylthiophene | 2.62 | 2.56 | 2.58 | 0.04 |
| 2-Octanol | 1.53 | 1.62 | 1.61 | -0.08 |
| 2-Octanone | 2.26 | 2.28 | 2.29 | -0.03 |
| 2-Pentanol | 2.92 | 3.03 | 3.01 | -0.09 |
| 2-Pentyne | 4.5 | 4.43 | 4.41 | 0.09 |
| 2-Phenylethylamine | 1.63 | 1.56 | 1.55 | 0.08 |
| 2-Picoline | 3.18 | 3.02 | 2.99 | 0.19 |
| 2-Propanethiol | 4.57 | 4.37 | 4.36 | 0.21 |
| 2-Propanol | 3.8 | 3.97 | 3.98 | -0.18 |
| 2-Propyltoluene | 2.12 | 2.04 | 2.03 | 0.09 |
| 2-Propyn-1-ol | 3.34 | 3.65 | 3.63 | -0.29 |
| 2-Pyrrolidone | 0.45 | 0.37 | 0.33 | 0.12 |
| 2-t-Butyl-4-methylphenol | 0.37 | 0.23 | 0.23 | 0.14 |
| 2-t-Butyl-5-methylphenol | 0.56 | 0.23 | 0.24 | 0.32 |
| 2-t-Butylanthracene | -2.86 | -2.76 | -2.79 | -0.07 |
| 2-t-Butylphenol | 1.04 | 0.49 | 0.49 | 0.55 |
| 2-Tetradecanol | -1.52 | -1.2 | -1.18 | -0.34 |
| 2-t-Pentylphenol | 0.69 | 0.02 | 0.02 | 0.67 |
| 2-Undecanol | 0.1 | 0.21 | 0.23 | -0.14 |
| 2-Undecanone | 0.75 | 0.87 | 0.87 | -0.12 |
| 3-(Difluoromethoxy)-1,1,1,2,2-pentafluoropropane | 4.65 | 4.49 | 4.45 | 0.2 |
| 3-(Perfluorobutyl)propanol | 1.95 | 1.59 | 1.59 | 0.36 |
| 3,3,3-Trifluoropropene | 5.76 | 5.67 | 5.68 | 0.08 |
| 3,3',4,4',5-Pentachlorobiphenyl | -3.31 | -2.6 | -2.63 | -0.68 |
| 3,3',4,4',5-Pentachlorodiphenyl ether | -3.25 | -2.96 | -2.97 | -0.28 |
| 3,3',4,4'-Tetrabromodiphenyl ether | -3.92 | -3.48 | -3.48 | -0.44 |
| 3,3',4,4'-Tetrachlorobiphenyl | -2.66 | -1.96 | -1.97 | -0.69 |
| 3,3',4,4'-Tetrachlorodiphenyl ether | -2.59 | -2.32 | -2.36 | -0.23 |
| 3,3',4,5,5'-Pentachlorobiphenyl | -3.11 | -2.6 | -2.65 | -0.46 |
| 3,3',4,5'-Tetrachlorobiphenyl | -2.47 | -1.96 | -1.95 | -0.52 |
| 3,3',4,5-Tetrachlorobiphenyl | -2.5 | -1.96 | -1.97 | -0.53 |
| 3,3',4-Tribromodiphenyl ether | -2.94 | -2.55 | -2.59 | -0.35 |
| 3,3',4-Trichlorobiphenyl | -1.89 | -1.32 | -1.32 | -0.57 |
| 3,3',5,5'-Tetrachlorobiphenyl | -2.26 | -1.96 | -1.99 | -0.27 |
| 3,3',5-Trichlorobiphenyl | -1.72 | -1.32 | -1.34 | -0.38 |
| 3,3,5-Trimethylheptane | 2.75 | 2.79 | 2.83 | -0.08 |
| 3,3'-Bitolyl | -0.39 | 0.08 | 0.09 | -0.48 |
| 3,3'-Dichlorobiphenyl | -1.05 | -0.68 | -0.7 | -0.35 |
| 3,3-Dimethyl-1-butene | 4.76 | 4.58 | 4.6 | 0.16 |
| 3,3-Dimethyl-1-pentene | 4.14 | 4.11 | 4.12 | 0.02 |
| 3,3-Dimethylhexane | 3.58 | 3.47 | 3.47 | 0.11 |
| 3,3-Dimethylpentane | 4.04 | 3.94 | 3.95 | 0.09 |
| 3,4,4',5-Tetrachlorobiphenyl | -2.54 | -1.96 | -1.95 | -0.59 |
| 3,4,4'-Tribromodiphenyl ether | -3.1 | -2.55 | -2.61 | -0.49 |
| 3,4,4'-Trichlorobiphenyl | -1.9 | -1.32 | -1.34 | -0.56 |
| 3,4,5,6-Tetrachloroguaiacol | -0.86 | -1.26 | -1.27 | 0.41 |
| 3,4,5-Trichlorobiphenyl | -1.98 | -1.32 | -1.32 | -0.66 |
| 3,4',5-Trichlorobiphenyl | -1.69 | -1.32 | -1.34 | -0.35 |
| 3,4,5-Trichloroguaiacol | -0.19 | -0.62 | -0.63 | 0.44 |
| 3,4'-Dibromodiphenyl ether | -2 | -1.62 | -1.66 | -0.34 |
| 3,4-Dibromodiphenyl ether | -1.97 | -1.62 | -1.63 | -0.34 |
| 3,4-Dichloroaniline | 0.23 | 0.27 | 0.27 | -0.04 |
| 3,4'-Dichlorobiphenyl | -1.23 | -0.68 | -0.73 | -0.5 |
| 3,4-Dichlorobiphenyl | -1.27 | -0.68 | -0.69 | -0.58 |
| 3,4-Dichloronitrobenzene | 0.15 | 0.18 | 0.17 | -0.02 |
| 3,4-Dichlorophenol | 0.38 | 0.47 | 0.49 | -0.11 |
| 3,4-Dichlorotoluene | 1.75 | 1.96 | 1.95 | -0.2 |
| 3,4-Dimethylhexane | 3.46 | 3.58 | 3.61 | -0.15 |
| 3,4-Lutidine | 2.35 | 2.71 | 2.79 | -0.44 |
| 3,4-Xylidine | 0.56 | 1.03 | 1.06 | -0.5 |
| 3,5,5-Trimethyl-2-cyclohexenone | 1.7 | 1.06 | 1.05 | 0.65 |
| 3,5-Dichlorobiphenyl | -0.9 | -0.68 | -0.71 | -0.19 |
| 3,5-Dichlorosyringol | -0.33 | -0.43 | -0.41 | 0.08 |
| 3,5-Lutidine | 2.36 | 2.71 | 2.74 | -0.38 |
| 3-Bromochlorobenzene | 2 | 1.93 | 1.92 | 0.08 |
| 3-Bromodiphenyl ether | -0.9 | -0.69 | -0.79 | -0.11 |
| 3-Bromopyridine | 2.39 | 2.3 | 2.25 | 0.14 |
| 3-Bromotoluene | 2.17 | 2.31 | 2.32 | -0.15 |
| 3-Chloroaniline | 1.1 | 0.91 | 0.88 | 0.22 |
| 3-Chlorobiphenyl | 0 | -0.04 | -0.06 | 0.06 |
| 3-Chloronitrobenzene | 0.8 | 0.82 | 0.8 | 0 |
| 3-Chlorophenol | 1.22 | 1.11 | 1.09 | 0.13 |
| 3-Chlorostyrene | 2.13 | 2.3 | 2.31 | -0.19 |
| 3-Chlorosyringol | -0.08 | 0.21 | 0.23 | -0.31 |
| 3-Chlorotoluene | 2.69 | 2.6 | 2.59 | 0.1 |
| 3-Difluoromethoxy-1,1,2,2-tetrafluoropropane | 4.12 | 4.18 | 4.16 | -0.04 |
| 3-Ethyl-1-pentene | 4.04 | 3.96 | 3.95 | 0.08 |
| 3-Ethyl-2-methylpentane | 3.5 | 3.58 | 3.6 | -0.1 |
| 3-Ethyl-3-methylpentane | 3.49 | 3.47 | 3.49 | 0 |
| 3-Ethylheptane | 3.32 | 2.85 | 2.87 | 0.45 |
| 3-Ethylhexane | 3.43 | 3.32 | 3.35 | 0.08 |
| 3-Ethyl-o-xylene | 1.94 | 2.25 | 2.28 | -0.34 |
| 3-Ethylpentane | 3.89 | 3.79 | 3.81 | 0.08 |
| 3-Ethylphenol | 0.84 | 1.02 | 1.02 | -0.18 |
| 3-Ethylpyridine | 2.52 | 2.5 | 2.51 | 0.01 |
| 3-Ethyltoluene | 2.63 | 2.51 | 2.5 | 0.13 |
| 3-Fluorobenzotrifluoride | 3.71 | 3.43 | 3.43 | 0.28 |
| 3-Fluoroiodobenzene | 2.19 | 2.27 | 2.26 | -0.07 |
| 3-Fluoronitrobenzene | 1.76 | 1.56 | 1.58 | 0.18 |
| 3-Heptanol | 2 | 2.09 | 2.11 | -0.11 |
| 3-Heptanone | 2.56 | 2.75 | 2.76 | -0.2 |
| 3-Hexanol | 2.57 | 2.56 | 2.58 | -0.01 |
| 3-Hexanone | 3.27 | 3.22 | 3.23 | 0.04 |
| 3-Hexyne | 4.07 | 3.96 | 4.01 | 0.06 |
| 3-Hydroxybenzaldehyde | 0.26 | 0.45 | 0.45 | -0.19 |
| 3-Isopropyltoluene | 2.31 | 2.3 | 2.3 | 0.01 |
| 3-Methoxysalicylaldehyde | -0.04 | 0 | 0.01 | -0.05 |
| 3-Methyl-1,2-butadiene | 4.76 | 4.81 |  | -0.05 |
| 3-Methyl-1-butene | 5.07 | 4.9 | 4.92 | 0.15 |
| 3-Methyl-1-butyne | 4.94 | 4.93 | 4.94 | 0 |
| 3-Methyl-1-hexene | 4.04 | 3.96 | 3.95 | 0.09 |
| 3-Methyl-1-pentene | 4.55 | 4.43 | 4.44 | 0.11 |
| 3-Methyl-2-butanol | 3.09 | 3.29 | 3.31 | -0.22 |
| 3-Methyl-2-butanone | 3.85 | 3.95 | 3.96 | -0.11 |
| 3-Methyl-2-butenyl acetate | 2.67 | 3.03 | 3.03 | -0.36 |
| 3-Methyl-2-pentanol | 2.64 | 2.82 | 2.84 | -0.2 |
| 3-Methyl-3-pentanol | 2.87 | 2.83 | 2.84 | 0.03 |
| 3-Methylbenzaldehyde | 1.65 | 1.94 | 1.91 | -0.26 |
| 3-Methylbutanoic acid | 1.79 | 1.87 | 1.87 | -0.08 |
| 3-Methylcholanthrene | -5.83 | -6.44 | -6.52 | 0.69 |
| 3-Methyl-cis-2-pentene | 4.31 | 4.4 | 4.4 | -0.09 |
| 3-Methylcyclopentene | 3.41 | 3.26 | 3.24 | 0.17 |
| 3-Methyleneheptane | 3.43 | 3.43 | 3.46 | -0.03 |
| 3-Methylglutaric acid | -3.04 | -3.22 | -3.23 | 0.19 |
| 3-Methylheptane | 3.41 | 3.32 | 3.33 | 0.08 |
| 3-Methylhexane | 3.91 | 3.79 | 3.81 | 0.1 |
| 3-Methylnonane | 2.42 | 2.38 | 2.41 | 0.01 |
| 3-Methyloctane | 2.94 | 2.85 | 2.87 | 0.07 |
| 3-Methylpentane | 4.4 | 4.26 | 4.26 | 0.14 |
| 3-Methylpyridine | 2.9 | 2.97 | 3.04 | -0.14 |
| 3-Methylstyrene | 2.4 | 2.68 | 2.7 | -0.3 |
| 3-Methylthiophene | 3.48 | 3.63 | 3.69 | -0.21 |
| 3-Methyl-trans-2-pentene | 4.27 | 4.4 | 4.43 | -0.16 |
| 3-Methylundecane | 1.41 | 1.44 | 1.44 | -0.03 |
| 3-Nitrobenzotrifluoride | 1.54 | 1.29 | 1.26 | 0.27 |
| 3-Nitrotoluene | 1.15 | 1.2 | 1.2 | -0.05 |
| 3-Nonanol | 1.18 | 1.15 | 1.17 | 0.01 |
| 3-Octanol | 1.64 | 1.62 | 1.64 | 0 |
| 3-Octanone | 2.46 | 2.28 | 2.29 | 0.17 |
| 3-Pentanol | 3.06 | 3.03 | 3.04 | 0.02 |
| 3-Propyltoluene | 2.18 | 2.04 | 2.05 | 0.13 |
| 3-t-Butylphenol | 0.07 | 0.49 | 0.5 | -0.43 |
| 4,4,6-Trimethyl-1,3-dioxane | 2.91 | 2.78 | 2.73 | 0.18 |
| 4,4'-Dibromodiphenyl ether | -2.06 | -1.62 | -1.61 | -0.45 |
| 4,4'-Dichlorobiphenyl | -1.14 | -0.68 | -0.68 | -0.46 |
| 4,4-Dimethyl-1-pentene | 4.26 | 4.11 | 4.11 | 0.15 |
| 4,5,6-Trichloroguaiacol | -0.6 | -0.62 | -0.61 | 0.01 |
| 4,5-Dichloroguaiacol | 0.19 | 0.02 | 0.01 | 0.18 |
| 4,5-Dimethylphenanthrene | -1.91 | -2.02 | -2.07 | 0.16 |
| 4-Acetoxyacetophenone | -0.13 | 0 | -0.19 | 0.07 |
| 4-Allyl-2-methoxyphenol | 0.23 | 0.27 | 0.26 | -0.03 |
| 4-Amino-3,5,6-trichloro-2-pyridinecarboxlic acid | -4.08 | -3.96 | -3.74 | -0.34 |
| 4-Bromodiphenyl ether | -0.59 | -0.69 | -0.73 | 0.14 |
| 4-Bromophenol | 0.56 | 0.82 | 0.8 | -0.24 |
| 4-Bromotoluene | 2.18 | 2.31 | 2.31 | -0.13 |
| 4-Chloroaniline | 0.55 | 0.91 | 0.97 | -0.42 |
| 4-Chlorobiphenyl | -0.04 | -0.04 | -0.06 | 0.02 |
| 4-Chloroiodobenzene | 1.21 | 1.53 | 1.54 | -0.33 |
| 4-Chloro-m-cresol | 0.82 | 0.85 | 0.83 | -0.01 |
| 4-Chloronitrobenzene | 0.46 | 0.82 | 0.81 | -0.35 |
| 4-Chlorophenol | 1.07 | 1.11 | 1.13 | -0.06 |
| 4-Chlorotoluene | 2.57 | 2.6 | 2.59 | -0.02 |
| 4-Cumylphenyl diphenyl phosphate | -8.76 | -8.8 | -8.67 | -0.09 |
| 4-Ethyl-m-xylene | 2.07 | 2.25 | 2.28 | -0.21 |
| 4-Ethyl-o-xylene | 2.14 | 2.25 | 2.3 | -0.16 |
| 4-Ethylphenol | 0.7 | 1.02 | 1.01 | -0.32 |
| 4-Ethylpyridine | 2.48 | 2.5 | 2.51 | -0.03 |
| 4-Ethyltoluene | 2.6 | 2.51 | 2.5 | 0.1 |
| 4-Fluoroiodobenzene | 2.22 | 2.27 | 2.28 | -0.06 |
| 4-Fluoronitrobenzene | 1.65 | 1.56 | 1.55 | 0.1 |
| 4-Fluorophenol | 1.71 | 1.85 | 1.88 | -0.17 |
| 4-Heptanol | 2.11 | 2.09 | 2.1 | 0.01 |
| 4-Heptanone | 2.22 | 2.75 | 2.76 | -0.54 |
| 4-Iodophenol | 0.33 | 0.42 | 0.4 | -0.07 |
| 4-Methyl-1-hexene | 4 | 3.96 | 3.95 | 0.05 |
| 4-Methyl-1-pentanol | 2.05 | 2.3 | 2.29 | -0.24 |
| 4-Methyl-1-pentene | 4.56 | 4.43 | 4.44 | 0.12 |
| 4-Methyl-2-pentanol | 2.84 | 2.82 | 2.84 | 0 |
| 4-Methylbenzaldehyde | 1.54 | 1.94 | 1.91 | -0.37 |
| 4-Methyl-cis-2-pentene | 4.51 | 4.46 | 4.49 | 0.02 |
| 4-Methylcyclopentene | 3.43 | 3.26 | 3.27 | 0.16 |
| 4-Methylheptane | 3.44 | 3.32 | 3.34 | 0.1 |
| 4-Methylnonane | 2.49 | 2.38 | 2.38 | 0.11 |
| 4-Methyloctane | 2.96 | 2.85 | 2.85 | 0.11 |
| 4-Methylpent-3-en-2-one | 3.17 | 3.62 | 3.66 | -0.49 |
| 4-Methylpyridine | 2.9 | 2.97 | 2.98 | -0.08 |
| 4-Methylstyrene | 2.39 | 2.68 | 2.7 | -0.31 |
| 4-Methyl-trans-2-pentene | 4.47 | 4.46 | 4.44 | 0.03 |
| 4-Nitrotoluene | 1.36 | 1.2 | 1.19 | 0.17 |
| 4-Octylphenol | -1.15 | -1.8 | -1.79 | 0.64 |
| 4-Propylphenol | 0.88 | 0.55 | 0.51 | 0.37 |
| 4-Propyltoluene | 2.17 | 2.04 | 2.01 | 0.16 |
| 4-t-Butylphenol | 0.56 | 0.49 | 0.51 | 0.05 |
| 5-Ethyl-m-xylene | 1.87 | 2.25 | 2.3 | -0.43 |
| 5-Isopropyl-2-methylphenol | 0.55 | 0.55 | 0.59 | -0.04 |
| 5-Methyl-1-hexene | 4.02 | 3.96 | 3.95 | 0.07 |
| 5-Methylnonane | 2.47 | 2.38 | 2.4 | 0.07 |
| 5-Nonanone | 1.89 | 1.81 | 1.82 | 0.07 |
| 6-Methyl-1-heptene | 3.1 | 3.49 | 3.5 | -0.4 |
| 7,12-Dimethylbenz[a]anthracene | -5.2 | -4.52 | -4.61 | -0.58 |
| 9,10-Benzophenanthrene | -3.89 | -4 | -4.07 | 0.18 |
| 9,10-Dihydroanthracene | -1.48 | -2.16 | -2.17 | 0.69 |
| 9,10-Diphenylanthracene | -7.73 | -7.3 | -7.35 | -0.38 |
| Acenaphthene | -0.49 | -1.18 | -1.23 | 0.74 |
| Acenaphthylene | -0.9 | -1.56 | -1.58 | 0.68 |
| Acetaldehyde | 5.08 | 4.84 | 4.85 | 0.23 |
| Acetamide | 1.99 | 2.3 | 2.37 | -0.38 |
| Acetic acid | 3.21 | 3.02 | 3.02 | 0.19 |
| Acetol | 2.75 | 2.67 | 2.65 | 0.1 |
| Acetonitrile | 4.08 | 4.68 | 4.69 | -0.61 |
| Acetophenone | 1.72 | 1.99 | 1.98 | -0.26 |
| Acetylacetone | 3.01 | 2.91 | 2.92 | 0.09 |
| Acetylchloride | 4.86 | 4.75 | 4.74 | 0.12 |
| Acrylic acid | 2.76 | 2.72 | 2.69 | 0.07 |
| Adamantane | 1.26 | 1.52 | 1.45 | -0.19 |
| Adiponitrile | 2.1 | 1.6 | 1.51 | 0.58 |
| Allyl acetate | 3.67 | 3.74 | 3.74 | -0.07 |
| Allyl alcohol | 3.54 | 3.62 | 3.61 | -0.07 |
| Allyl chloride | 4.69 | 4.51 | 4.52 | 0.17 |
| Allyl cyanide | 3.39 | 3.91 | 3.94 | -0.55 |
| Allyl hexanoate | 1.91 | 1.86 | 1.86 | 0.05 |
| Allyl sulfide | 3.12 | 3.16 | 3.17 | -0.05 |
| Allylamine | 4.53 | 4.37 | 4.36 | 0.17 |
| alpha,alpha-Dimethylphenethylamine | 1.51 | 1.25 | 1.15 | 0.35 |
| alpha-Curcumene | 0.04 | 0.35 | 0.33 | -0.29 |
| alpha-Ionone | 0.33 | -0.02 | 0.02 | 0.31 |
| alpha-Methyl benzylamine | 1.92 | 1.87 | 1.84 | 0.08 |
| alpha-Methylstyrene | 2.47 | 2.67 | 2.65 | -0.18 |
| alpha-Pinene | 2.77 | 2.45 | 2.5 | 0.27 |
| Alverine | -2.85 | -3.39 | -3.42 | 0.57 |
| Ametryn | -3.44 | -3.54 |  | 0.1 |
| Amyl acetate | 2.66 | 2.63 | 2.65 | 0.01 |
| Amyl propionate | 2.68 | 2.16 | 2.19 | 0.49 |
| Amylamine | 3.32 | 3.26 | 3.26 | 0.06 |
| Amylbenzene | 1.65 | 1.36 | 1.35 | 0.3 |
| Aniline | 1.96 | 1.55 | 1.56 | 0.4 |
| Anthracene | -1.18 | -1.5 | -1.5 | 0.32 |
| Arachic alcohol | -4.38 | -4.54 | -4.56 | 0.18 |
| Atrazine | -4.4 | -4.32 |  | -0.08 |
| Azepane | 3.08 | 3.29 | 3.33 | -0.25 |
| Azetidine | 4.37 | 4.36 | 4.36 | 0.01 |
| Azidocyclopentane | 3.15 | 3.13 | 3.01 | 0.14 |
| Aziridine | 4.47 | 4.41 | 4.38 | 0.09 |
| Azocane | 2.61 | 3.16 | 3.12 | -0.51 |
| Barban | -4.3 | -4.32 | -4.36 | 0.06 |
| Benz[a]anthracene | -3.73 | -4 | -4.09 | 0.36 |
| Benz[e]acephenanthrylene | -6 | -6.22 | -6.29 | 0.29 |
| Benzalchloride | 1.82 | 1.71 | 1.69 | 0.13 |
| Benzaldehyde | 2.23 | 2.2 | 2.18 | 0.05 |
| Benzene | 4.1 | 3.5 | 3.48 | 0.62 |
| Benzo[a]fluorene | -3.96 | -4.07 | -4.05 | 0.09 |
| Benzo[a]phenanthrene | -3.75 | -4 | -4.07 | 0.32 |
| Benzo[a]pyrene | -6.14 | -6.14 | -6.21 | 0.07 |
| Benzo[b]fluorene | -3.51 | -4.07 | -4.02 | 0.51 |
| Benzo[b]naphtho[2,3-d]thiophene | -3.39 | -3.36 |  | -0.03 |
| Benzo[b]triphenylene | -6.46 | -6.5 | -6.59 | 0.13 |
| Benzo[e]pyrene | -6.1 | -6.14 | -6.21 | 0.11 |
| Benzo[f]quinoline | -2.13 | -1.93 |  | -0.2 |
| Benzo[ghi]perylene | -8 | -8.28 | -8.41 | 0.41 |
| Benzonitrile | 2 | 2.04 | 2.03 | -0.03 |
| Benzophenone | -0.88 | -0.65 | -0.66 | -0.21 |
| Benzotrifluoride | 3.71 | 3.33 | 3.33 | 0.38 |
| Benzoyl chloride | 1.92 | 2.11 | 2.15 | -0.23 |
| Benzphetamine | -1.4 | -1.73 | -1.74 | 0.34 |
| Benzyl acetate | 1.37 | 1.4 | 1.4 | -0.03 |
| Benzyl alcohol | 1.18 | 1.28 | 1.27 | -0.09 |
| Benzyl benzoate | -1.51 | -1.24 | -1.26 | -0.25 |
| Benzyl butyl phthalate | -4.21 | -4.28 | -4.37 | 0.16 |
| Benzyl ethyl ether | 2.09 | 1.99 | 1.94 | 0.15 |
| Benzylamine | 1.98 | 2.03 | 2.01 | -0.03 |
| beta-Citronellol | 0.31 | 0.82 | 0.84 | -0.53 |
| beta-HCH | -0.58 | -0.7 | -0.75 | 0.18 |
| beta-Phellandrene | 2.32 | 1.65 | 1.62 | 0.7 |
| beta-Sesquiphellandrene | 0.18 | -0.3 | -0.33 | 0.51 |
| Bicifadine | 0.11 | 0.4 | 0.43 | -0.32 |
| Bicyclohexyl | 1.16 | 1.3 | 1.24 | -0.08 |
| Bifenox | -5.27 | -4.9 | -4.94 | -0.33 |
| Biphenyl | 0.63 | 0.6 | 0.61 | 0.02 |
| Biphenylene | -0.43 | -0.54 | -0.49 | 0.06 |
| Bis(2-chloroethyl) ether | 2.32 | 2.49 | 2.51 | -0.19 |
| Bis(3-aminopropyl)amine | 0.61 | 0.73 | 0.69 | -0.08 |
| Bis(perfluorobutyl)disulfide | 2.56 | 2.4 | 2.33 | 0.23 |
| Bistrifluoromethyl disulfide | 4.85 | 4.8 |  | 0.05 |
| Bromobenzene | 2.73 | 2.57 | 2.56 | 0.17 |
| Bromocyclohexane | 2.61 | 2.67 | 2.66 | -0.05 |
| Bromoethane | 4.6 | 4.54 | 4.54 | 0.06 |
| Bromoethylene | 5.13 | 4.8 |  | 0.33 |
| Butanal | 4.17 | 3.9 | 3.88 | 0.29 |
| Butane | 5.36 | 4.94 | 4.96 | 0.4 |
| Butanedioic acid | -2.51 | -2.54 | -2.56 | 0.05 |
| Butanoic acid | 2.12 | 2.08 | 2.1 | 0.02 |
| Butyl 1,1-dimethylpropyl ether | 2.79 | 2.78 | 2.83 | -0.04 |
| Butyl 4-oxopentanoate | 0.59 | 0.91 | 0.89 | -0.3 |
| Butyl butanoate | 2.38 | 2.16 | 2.18 | 0.2 |
| Butyl glycolate | 1.65 | 1.14 | 1.14 | 0.51 |
| Butyl isocyanate | 3.46 | 3.45 |  | 0.01 |
| Butyl lactate | 1.67 | 1.19 | 1.18 | 0.49 |
| Butyl propanoate | 2.76 | 2.63 | 2.64 | 0.12 |
| Butyl t-octyl ether | 1.79 | 1.78 | 1.8 | -0.01 |
| Butyl-1,2-dinitrate | 1.8 | 1.78 | 1.8 | 0 |
| Butylacetamide | 0.78 | 0.29 | 0.24 | 0.54 |
| Butylbenzene | 2.14 | 1.83 | 1.81 | 0.33 |
| Butylcellosolve | 2.09 | 1.73 | 1.72 | 0.37 |
| Butylcyclohexane | 2.24 | 2.18 | 2.16 | 0.08 |
| Butylcyclopentane | 2.69 | 2.91 | 2.91 | -0.22 |
| Butylmethylketone | 3.21 | 3.22 | 3.22 | -0.01 |
| Butylsilane | 4.51 | 4.5 |  | 0.01 |
| Butyric acid methylester | 3.63 | 3.38 | 3.41 | 0.22 |
| Butyronitrile | 3.42 | 3.74 | 3.79 | -0.38 |
| Camphene | 2.7 | 2.68 | 2.68 | 0.02 |
| Camphor | 1.62 | 1.68 | 1.63 | -0.01 |
| Capraldehyde | 1.13 | 1.08 | 1.08 | 0.05 |
| Caproic aldehyde | 3.17 | 2.96 | 2.95 | 0.22 |
| Caprylene | 3.36 | 3.23 | 3.23 | 0.13 |
| Caprylic aldehyde | 2.19 | 2.02 | 2.06 | 0.13 |
| Carbitol | 1.24 | 1.42 | 1.4 | -0.16 |
| Carbofuran | -4.14 | -4.11 | -4.08 | -0.06 |
| Carvone | 1.04 | 0.81 | 0.89 | 0.15 |
| Cedrol | -1.16 | -0.88 | -0.92 | -0.23 |
| Cetane | -0.72 | -0.7 | -0.68 | -0.04 |
| Cetene | -0.44 | -0.53 | -0.51 | 0.07 |
| Chloral | 3.84 | 3.27 | 3.22 | 0.62 |
| Chlorfenvinphos | -3 | -2.63 | -2.46 | -0.54 |
| Chloroacetic acid | 1.6 | 1.95 | 1.93 | -0.33 |
| Chloroacetic acid ethylester | 2.81 | 2.97 | 2.98 | -0.17 |
| Chloroacetone | 3.21 | 3.56 | 3.55 | -0.34 |
| Chloroacetyl chloride | 3.52 | 3.68 | 3.73 | -0.21 |
| Chlorobenzene | 3.2 | 2.86 | 2.84 | 0.36 |
| Chlorocyclohexane | 3.03 | 3.05 | 3.04 | -0.01 |
| Chloroethane | 5.08 | 4.81 | 4.81 | 0.27 |
| Chloroethylene | 5.54 | 5.23 | 5.2 | 0.34 |
| Chloropentafluorobenzene | 3.38 | 3.36 | 3.34 | 0.04 |
| Chloroprene | 4.48 | 4.47 | 4.55 | -0.07 |
| Chloropropham | -2.88 | -2.5 | -2.29 | -0.59 |
| Chlorothalonil | -2.09 | -1.98 | -1.95 | -0.14 |
| Chlorpyrifos-methyl | -2.25 | -2.26 |  | 0.01 |
| Chlorpyriphos | -2.6 | -2.82 |  | 0.22 |
| Cinnamaldehyde | 0.92 | 1.46 | 1.46 | -0.54 |
| cis 3-Hexenyl butyrate | 1.41 | 1.42 | 1.43 | -0.02 |
| cis- Cyclooctene | 3.01 | 2.72 | 2.71 | 0.3 |
| cis-1,1,1,4,4,4-Hexafluoro-2-butene | 4.87 | 5.32 | 5.33 | -0.46 |
| cis-1,2-Dibromoethylene | 3.39 | 3.58 |  | -0.19 |
| cis-1,2-Dichloroethylene | 4.44 | 4.44 | 4.39 | 0.05 |
| cis-1,2-Dimethylcyclohexane | 3.29 | 3.38 | 3.33 | -0.04 |
| cis-1,2-Dimethylcyclopentane | 3.81 | 4.11 | 4.11 | -0.3 |
| cis-1,3-Dichloropropene | 3.71 | 3.98 | 4.03 | -0.32 |
| cis-1,3-Dimethylcyclohexane | 3.46 | 3.38 | 3.37 | 0.09 |
| cis-1,3-Dimethylcyclopentane | 4.07 | 4.11 | 4.09 | -0.02 |
| cis-1,3-Pentadiene | 4.7 | 4.84 | 4.84 | -0.14 |
| cis-1,4-Dichloro-2-butene | 2.74 | 3 | 3 | -0.26 |
| cis-1,4-Dimethylcyclohexane | 3.38 | 3.38 | 3.37 | 0.01 |
| cis-1,4-Hexadiene | 4.37 | 4.37 | 4.37 | 0 |
| cis-1-Phenyl-1-propene | 2.31 | 2.5 | 2.52 | -0.21 |
| cis-2-Butene | 5.33 | 5.14 | 5.13 | 0.2 |
| cis-2-Heptene | 3.81 | 3.73 | 3.74 | 0.07 |
| cis-2-Hexene | 4.3 | 4.2 | 4.2 | 0.1 |
| cis-2-Methylcyclohexanol | 2.3 | 2.15 | 2.15 | 0.15 |
| cis-2-Octene | 3.38 | 3.26 | 3.26 | 0.12 |
| cis-2-Pentene | 4.82 | 4.67 | 4.69 | 0.13 |
| cis-3-Heptene | 3.87 | 3.73 | 3.74 | 0.13 |
| cis-3-Hexene | 4.3 | 4.2 | 4.21 | 0.09 |
| cis-3-Hexenyl 2-methylbutyrate | 1.19 | 1.21 | 1.21 | -0.02 |
| cis-3-Hexenyl propionate | 1.82 | 1.89 | 1.87 | -0.05 |
| cis-3-Octene | 3.37 | 3.26 | 3.27 | 0.1 |
| cis-4,6-Dimethyl-1,3-dioxane | 2.9 | 2.99 | 3.07 | -0.17 |
| cis-4-Octene | 3.38 | 3.26 | 3.26 | 0.12 |
| cis-5-Octenyl propionate | 0.85 | 0.95 | 0.98 | -0.13 |
| cis-Crotononitrile | 3.63 | 3.94 | 3.99 | -0.36 |
| cis-Cyclohexane-1,2-dinitrate | 0.74 | 0.54 | 0.51 | 0.23 |
| cis-Cyclohexane-1,3-dinitrate | 0.25 | 0.54 | 0.53 | -0.28 |
| cis-Decalin | 2.04 | 2.4 | 2.31 | -0.27 |
| cis-Stilbene | -0.02 | -0.14 | -0.17 | 0.15 |
| cis-Verbenol | 0.72 | 1.01 | 1.01 | -0.29 |
| Citronellal | 1.43 | 1.74 | 1.72 | -0.29 |
| Citronellyl acetate | 0.6 | 0.94 | 0.98 | -0.38 |
| Coumarin | -0.4 | -0.79 | -0.81 | 0.42 |
| Crotonaldehyde | 3.72 | 4.1 | 4.11 | -0.39 |
| Cryofluorane | 5.31 | 5.3 | 5.33 | -0.02 |
| Cumene | 2.77 | 2.56 | 2.53 | 0.24 |
| Cyanazine | -5.28 | -5.67 |  | 0.39 |
| Cyanoethylene | 4.21 | 4.38 | 4.37 | -0.16 |
| Cyclobutane | 5.2 | 4.74 | 4.71 | 0.49 |
| Cyclobutanone | 3.75 | 3.23 | 3.28 | 0.47 |
| Cyclogeraniolane | 3.17 | 3.06 | 3.08 | 0.09 |
| Cycloheptane | 3.46 | 3.67 | 3.63 | -0.17 |
| Cycloheptene | 3.43 | 2.85 | 2.84 | 0.59 |
| Cyclohexane | 4.11 | 3.8 | 3.8 | 0.31 |
| Cyclohexanethiol | 2.75 | 2.76 | 2.72 | 0.02 |
| Cyclohexanol | 2.05 | 2.36 | 2.35 | -0.3 |
| Cyclohexanone | 2.76 | 2.34 | 2.32 | 0.44 |
| Cyclohexyl azide | 2.52 | 2.4 | 2.32 | 0.2 |
| Cyclohexylamine | 3.15 | 2.9 | 2.89 | 0.26 |
| Cyclohexylbenzene | 0.74 | 0.95 | 0.89 | -0.15 |
| Cyclooctane | 2.88 | 3.54 | 3.47 | -0.59 |
| Cyclopentane | 4.62 | 4.53 | 4.51 | 0.11 |
| Cyclopentanol | 2.47 | 3.09 | 3.08 | -0.61 |
| Cyclopentanone | 3.2 | 2.71 | 2.69 | 0.51 |
| Cymperator | -6.72 | -6.82 | -6.87 | 0.15 |
| DBCP | 1.88 | 1.87 | 1.88 | 0 |
| DDD | -3.01 | -2.89 | -2.9 | -0.11 |
| DDE | -2.59 | -2.44 | -2.46 | -0.13 |
| DDT | -3.24 | -2.93 | -2.95 | -0.29 |
| Decabromodiphenyl ether | -8.53 | -9.06 | -9.21 | 0.68 |
| Decachlorodiphenyl ether | -5.8 | -6.16 | -6.2 | 0.4 |
| Decafluorotetrahydrothiophene | 3.98 | 4.07 | 4.21 | -0.23 |
| Decamethylcyclopentasiloxane | 1.32 | 1.28 | 1.25 | 0.07 |
| Decamethyltetrasiloxane | 1.7 | 1.39 |  | 0.31 |
| Decane | 2.24 | 2.12 | 2.13 | 0.11 |
| Decanedioic acid | -5.42 | -5.36 | -5.38 | -0.04 |
| Decyl-1,2-dinitrate | -0.96 | -1.04 | -1.05 | 0.09 |
| Decylbenzene | -0.75 | -0.99 | -1 | 0.25 |
| Decylcyclohexane | -0.72 | -0.64 | -0.68 | -0.04 |
| delta-HCH | -0.82 | -0.7 | -0.65 | -0.17 |
| Demeton | -0.88 | -0.69 | -0.69 | -0.18 |
| Deprenyl | 0.4 | 0.64 | 0.66 | -0.26 |
| Devrinol | -3.28 | -3.72 | -3.79 | 0.51 |
| Diallate | -1.7 | -1.59 | -1.56 | -0.14 |
| Diamylamine | 1.58 | 1.27 | 1.33 | 0.25 |
| Dibenz[ah]anthracene | -6.6 | -6.5 | -6.47 | -0.13 |
| Dibenzo[b,d]thiophene | -0.82 | -0.86 | -0.91 | 0.09 |
| Dibenzo[b,e]pyridine | -2.19 | -2.09 |  | -0.1 |
| Dibenzo-p-dioxin | -1.26 | -1.94 | -1.95 | 0.69 |
| Dibenzylsulfide | -1.31 | -1.52 | -1.57 | 0.26 |
| Dibutyl carbonate | 1.41 | 1.38 | 1.37 | 0.04 |
| Dibutyl decanedioate | -3.19 | -3.44 | -3.47 | 0.28 |
| Dibutyl maleate | -1.06 | -0.42 | -0.37 | -0.69 |
| Dibutyl oxalate | 0.26 | 0.32 | 0.32 | -0.06 |
| Dibutyl phthalate | -2.37 | -2.58 | -2.61 | 0.24 |
| Dibutylacetamide | 0.38 | 0.24 | 0.2 | 0.18 |
| Dibutylamine | 2.53 | 2.21 | 2.19 | 0.34 |
| Dibutylsulfide | 2.21 | 1.88 | 1.87 | 0.34 |
| Dibutylsulfoxide | 0.36 | -0.15 | -0.37 | 0.73 |
| Dichlone | -3.48 | -3.18 | -3.03 | -0.45 |
| Dichloroacetic acid | 1.38 | 1.49 | 1.53 | -0.15 |
| Diclofop-methyl | -4.23 | -3.56 | -3.52 | -0.71 |
| Dicofol | -4.27 | -4.36 | -4.47 | 0.2 |
| Diethion | -3.8 | -3.84 |  | 0.04 |
| Diethyl disulfide | 2.75 | 2.8 | 2.83 | -0.08 |
| Diethyl glutarate | 0.55 | 0.79 | 0.8 | -0.25 |
| Diethyl malonate | 1.57 | 1.73 | 1.78 | -0.21 |
| Diethyl methylphosphonate | 1.75 | 1.78 |  | -0.03 |
| Diethyl oxalate | 1.76 | 2.2 | 2.21 | -0.45 |
| Diethyl phthalate | -0.69 | -0.7 | -0.75 | 0.06 |
| Diethyl succinate | 1.01 | 1.26 | 1.27 | -0.26 |
| Diethyl sulphide | 3.89 | 3.76 | 3.75 | 0.14 |
| Diethylacetamide | 1.9 | 2.12 | 2.22 | -0.32 |
| Diethylacetic acid | 1.4 | 1.4 | 1.36 | 0.04 |
| Diethylamine | 4.49 | 4.09 | 4.09 | 0.4 |
| Diethylcarbonate | 3.18 | 3.26 |  | -0.08 |
| Diethyleneglycol monobutyl ether | 0.48 | 0.48 | 0.47 | 0.01 |
| Diethylketone | 3.7 | 3.69 | 3.7 | 0 |
| Diethylsulfoxide | 1.31 | 1.73 | 1.88 | -0.58 |
| Diheptylamine | -0.29 | -0.61 | -0.59 | 0.3 |
| Dihexyl phthalate | -3.94 | -4.46 | -4.48 | 0.54 |
| Dihexyl sulfide | 0.02 | 0 | 0.02 | 0 |
| Dihexylacetamide | -1.39 | -1.64 | -1.68 | 0.29 |
| Dihexyladipate | -3.4 | -3.44 | -3.43 | 0.03 |
| Dihexylamine | 0.65 | 0.33 | 0.33 | 0.32 |
| Dihydropinene | 2.58 | 3.21 | 3.31 | -0.73 |
| Diisobutyl ether | 3.34 | 3.27 | 3.28 | 0.06 |
| Diisobutyl phthalate | -2 | -2.06 | -2.06 | 0.06 |
| Diisobutylamine | 2.99 | 2.77 | 2.73 | 0.26 |
| Diisobutylene | 3.79 | 3.84 | 3.84 | -0.05 |
| Diisopropyl ether | 4.3 | 4.17 | 4.2 | 0.1 |
| Diisopropyl methylphosphonate | 1.66 | 1.32 |  | 0.33 |
| Diisopropyl sulfide | 3.41 | 3.44 | 3.6 | -0.19 |
| Diisopropylamine | 4.02 | 3.77 | 3.87 | 0.15 |
| Diisopropylsulfoxide | 1.27 | 1.41 | 1.51 | -0.25 |
| Dimethoate | -2.94 | -2.97 | -3.03 | 0.09 |
| Dimethyl carbonate | 3.85 | 3.82 | 3.8 | 0.05 |
| Dimethyl disulfide | 3.6 | 3.78 |  | -0.18 |
| Dimethyl hexanedioate | 0.61 | 0.88 | 0.88 | -0.27 |
| Dimethyl oxalate | 2.33 | 2.76 | 2.76 | -0.43 |
| Dimethyl phthalate | -0.38 | -0.14 | -0.13 | -0.25 |
| Dimethyl sulfide | 4.82 | 4.74 | 4.73 | 0.09 |
| Dimethylacetal | 4.38 | 4.52 | 4.52 | -0.14 |
| Dimethylacetamide | 2.41 | 2.94 | 3.04 | -0.63 |
| Dimethylamine | 5.3 | 4.91 | 4.85 | 0.45 |
| Dimethylether | 5.77 | 5.19 | 5.14 | 0.63 |
| Di-n-butylether | 2.92 | 2.75 | 2.77 | 0.15 |
| Di-n-propyl phthalate | -1.76 | -1.64 | -1.67 | -0.09 |
| Dioctyl sulfide | -1.52 | -1.88 | -1.9 | 0.38 |
| Dioctylamine | -1.22 | -1.55 | -1.57 | 0.35 |
| Dipentyl phthalate | -3.25 | -3.52 | -3.57 | 0.32 |
| Diphenyl ether | 0.43 | 0.24 | 0.12 | 0.31 |
| Diphenylmethane | 0.29 | 0.13 | 0.08 | 0.21 |
| Dipropyl carbonate | 2.32 | 2.32 |  | 0 |
| Dipropyl ether | 3.92 | 3.69 | 3.71 | 0.21 |
| Dipropyl malonate | 0.77 | 0.79 | 0.77 | -0.01 |
| Dipropyl oxalate | 1.14 | 1.26 | 1.29 | -0.15 |
| Dipropyl sulfide | 2.95 | 2.82 | 2.84 | 0.11 |
| Dipropylamine | 3.42 | 3.15 | 3.13 | 0.29 |
| Dipropylsulfoxide | 0.88 | 0.79 | 0.75 | 0.13 |
| Di-s-butylsulfide | 2.52 | 2.5 | 2.66 | -0.14 |
| Disulfoton | -1.62 | -1.41 | -1.32 | -0.3 |
| Diuron | -3.6 | -3.78 |  | 0.18 |
| Docosane | -3.67 | -3.52 | -3.49 | -0.18 |
| Dodecafluorotetrahydrothiophene | 4.4 | 3.96 |  | 0.44 |
| Dodecahydrosqualene | -5.82 | -5.72 | -5.72 | -0.1 |
| Dodecamethylcyclohexasiloxane | 0.48 | 0.62 | 0.53 | -0.05 |
| Dodecane | 1.2 | 1.18 | 1.21 | -0.01 |
| Dodecyl acetate | -0.5 | -0.66 | -0.66 | 0.16 |
| Dopentacontane | -17.71 | -17.62 | -17.6 | -0.11 |
| Dotetracontane | -13.19 | -12.92 | -12.91 | -0.28 |
| Dotriacontane | -8.44 | -8.22 | -8.19 | -0.25 |
| d-Verbenone | 1.19 | 1.21 | 1.24 | -0.05 |
| Eicosane | -2.68 | -2.58 | -2.55 | -0.13 |
| Endrin | -2.28 | -2.03 |  | -0.25 |
| Enilconazole | -3.8 | -3.92 | -4.04 | 0.24 |
| Epichlorohydrin | 3.38 | 3.65 | 3.64 | -0.26 |
| Ethalfluralin | -3.65 | -3.45 | -3.42 | -0.23 |
| Ethanediol diacetate | 1.48 | 2.2 | 2.25 | -0.77 |
| Ethanethiol | 4.58 | 4.53 | 4.53 | 0.05 |
| Ethanol | 3.9 | 3.92 | 3.92 | -0.02 |
| Ethene | 6.4 | 6.02 | 6.02 | 0.38 |
| Ethyl 2-methylbutanoate | 3.55 | 2.89 | 2.89 | 0.66 |
| Ethyl 2-methylpentanoate | 2.61 | 2.42 | 2.43 | 0.18 |
| Ethyl acetate | 4.09 | 4.04 | 4.05 | 0.04 |
| Ethyl acetoacetate | 1.98 | 2.32 | 2.34 | -0.36 |
| Ethyl acrylate | 3.73 | 3.74 | 3.74 | -0.01 |
| Ethyl benzoate | 1.37 | 1.4 | 1.4 | -0.03 |
| Ethyl butanoate | 3.23 | 3.1 | 3.11 | 0.12 |
| Ethyl decanoate | 0.38 | 0.28 | 0.29 | 0.09 |
| Ethyl ether | 4.85 | 4.63 | 4.63 | 0.22 |
| Ethyl formate | 4.53 | 4.53 | 4.53 | 0 |
| Ethyl glycolate | 2.35 | 2.08 | 2.06 | 0.29 |
| Ethyl hexanoate | 2.2 | 2.16 | 2.18 | 0.02 |
| Ethyl iodide | 4.04 | 4.07 | 4.07 | -0.03 |
| Ethyl isobutanoate | 3.53 | 3.36 | 3.37 | 0.16 |
| Ethyl isovalerate | 3.06 | 2.89 | 2.91 | 0.15 |
| Ethyl lactate | 2.44 | 2.13 | 2.09 | 0.35 |
| Ethyl levulinate | 1.4 | 1.85 | 1.87 | -0.47 |
| Ethyl perfluorooctanoate | 2.11 | 1.91 | 1.86 | 0.25 |
| Ethyl propanoate | 3.67 | 3.57 | 3.59 | 0.08 |
| Ethyl t-amyl ether | 3.77 | 3.72 | 3.72 | 0.05 |
| Ethyl t-butyl ether | 4.21 | 4.19 | 4.21 | 0 |
| Ethyl t-octyl ether | 2.71 | 2.72 | 2.77 | -0.06 |
| Ethyl trans-cinnamate | 0.18 | 0.66 | 0.65 | -0.47 |
| Ethylacetamide | 1 | 1.23 | 1.28 | -0.28 |
| Ethylamine | 4.95 | 4.67 | 4.68 | 0.27 |
| Ethylbenzene | 3.1 | 2.77 | 2.78 | 0.32 |
| Ethylcarbamate | 1.31 | 1.36 | 1.53 | -0.22 |
| Ethylcyclohexane | 3.23 | 3.12 | 3.09 | 0.14 |
| Ethylcyclopentane | 3.73 | 3.37 | 3.39 | 0.34 |
| Ethylenedichloride | 4.02 | 3.74 | 3.74 | 0.28 |
| Ethylepoxide | 4.4 | 4.25 | 4.19 | 0.21 |
| Ethylisopropylketone | 3.38 | 3.48 | 3.48 | -0.1 |
| Ethylmethylether | 5.3 | 4.91 | 4.88 | 0.42 |
| Ethylnitrate | 3.94 | 4.01 | 4.01 | -0.07 |
| Ethylnitrite | 5.13 | 5.06 | 5.08 | 0.05 |
| Ethyl-n-propylether | 4.39 | 4.16 | 4.15 | 0.24 |
| Ethyl-t-butylsulfide | 3.42 | 3.35 | 3.35 | 0.06 |
| Ethyne | 6.59 | 6.32 | 6.25 | 0.34 |
| Ethynylbenzene | 3.03 | 2.97 | 2.94 | 0.09 |
| Fenchlorphos | -2.15 | -2.04 | -2.11 | -0.04 |
| Fenchone | 2.01 | 1.73 | 1.69 | 0.32 |
| Fenitrothion | -2.5 | -2.42 | -2.4 | -0.1 |
| Fenoprop | -2.64 | -2.24 | -2.22 | -0.42 |
| Fenoxycarb | -5.77 | -6.08 | -6.2 | 0.43 |
| Fenpropidin | -1.8 | -1.95 | -1.95 | 0.15 |
| Fluorene | -1.18 | -1.57 | -1.52 | 0.34 |
| Fluorobenzene | 4.01 | 3.6 | 3.61 | 0.4 |
| Fluoroethane | 5.94 | 5.69 | 5.67 | 0.27 |
| Fluoroethylene | 6.44 | 6.04 |  | 0.4 |
| Formic acid | 3.71 | 3.51 | 3.43 | 0.28 |
| Freon 113 | 4.65 | 4.63 | 4.62 | 0.03 |
| Furfural | 2.49 | 2.78 | 2.77 | -0.28 |
| Furfuranol | 1.99 | 1.86 | 1.8 | 0.19 |
| gamma-Bisabolene | -0.14 | -0.73 | -0.87 | 0.73 |
| Glycerol formal | 1.52 | 1.75 | 1.69 | -0.17 |
| Glyceryltriacetate | -0.46 | 0.13 | 0.16 | -0.62 |
| Guajen | 0.27 | 0.48 | 0.48 | -0.21 |
| Hemimellitene | 2.36 | 2.72 | 2.76 | -0.4 |
| Heneicosane | -3.18 | -3.05 | -3.04 | -0.14 |
| Heptachlor epoxide | -3.46 | -3.62 |  | 0.16 |
| Heptacosane | -5.95 | -5.87 | -5.85 | -0.1 |
| Heptadecane | -1.2 | -1.17 | -1.18 | -0.02 |
| Heptafluoropropyl trifluoromethyl ether | 5.3 | 5.34 | 5.29 | 0 |
| Heptane | 3.76 | 3.53 | 3.54 | 0.22 |
| Heptanedioic acid | -3.95 | -3.95 | -3.94 | -0.01 |
| Heptanonitrile | 2.26 | 2.33 | 2.35 | -0.09 |
| Heptatriacontane | -10.82 | -10.57 | -10.54 | -0.27 |
| Heptyl bromide | 2.22 | 2.19 | 2.23 | -0.01 |
| Heptyl butyrate | 0.89 | 0.75 | 0.76 | 0.13 |
| Heptylbenzene | 0.74 | 0.42 | 0.43 | 0.31 |
| Hexachlorobenzene | -0.52 | -0.34 | -0.34 | -0.18 |
| Hexachlorobutadiene | 1.49 | 1.28 | 1.07 | 0.42 |
| Hexacosane | -5.55 | -5.4 | -5.4 | -0.15 |
| Hexadecylamine | -1.96 | -1.91 | -1.9 | -0.06 |
| Hexafluorobenzene | 4.07 | 4.1 | 4.09 | -0.02 |
| Hexamethyldisiloxane | 3.75 | 4.07 |  | -0.32 |
| Hexamethyleneglycol | -1.16 | -0.66 | -0.68 | -0.48 |
| Hexane | 4.3 | 4 | 4.02 | 0.28 |
| Hexane-1,5-dinitrate | 0.72 | 0.5 | 0.5 | 0.22 |
| Hexane-2,5-dinitrate | 0.84 | 0.74 | 0.68 | 0.16 |
| Hexanenitrile | 2.6 | 2.8 | 2.78 | -0.18 |
| Hexapentacontane | -19.36 | -19.5 | -19.47 | 0.11 |
| Hexatetracontane | -15.06 | -14.8 | -14.77 | -0.29 |
| Hexatriacontane | -10.36 | -10.1 | -10.07 | -0.29 |
| Hexyl bromide | 2.72 | 2.66 | 2.66 | 0.06 |
| Hexyl glycolate | 0.66 | 0.2 | 0.2 | 0.46 |
| Hexyl hexanoate | 0.5 | 0.28 | 0.3 | 0.2 |
| Hexyl t-octyl ether | 0.84 | 0.84 | 0.82 | 0.02 |
| Hexyl-1,2-dinitrate | 0.92 | 0.84 | 0.86 | 0.06 |
| Hexylbenzene | 1.17 | 0.89 | 0.88 | 0.29 |
| Hydrogenperoxide | 2.48 | 2.4 |  | 0.08 |
| Icosafluorononane | 3.11 | 3.47 | 3.51 | -0.4 |
| Indeno[1,2,3-cd]pyrene | -7.99 | -8.36 | -8.35 | 0.36 |
| Iodobenzene | 2.14 | 2.17 | 2.18 | -0.04 |
| Isoamyl acetate | 2.88 | 2.89 | 2.92 | -0.04 |
| Isoamyl isobutyrate | 2.26 | 2.21 | 2.22 | 0.03 |
| Isobutyl acetate | 3.38 | 3.36 | 3.38 | 0 |
| Isobutyl acrylate | 3.05 | 3.06 | 3.05 | 0 |
| Isobutyl butanoate | 2.7 | 2.42 | 2.44 | 0.26 |
| Isobutyl chloride | 4.28 | 4.13 | 4.14 | 0.14 |
| Isobutyl formate | 3.73 | 3.85 | 3.86 | -0.13 |
| Isobutyl isobutyrate | 2.75 | 2.68 | 2.71 | 0.04 |
| Isobutyl t-butylether | 3.5 | 3.51 | 3.49 | 0.01 |
| Isobutylbenzene | 2.4 | 2.09 | 2.08 | 0.32 |
| Isobutylene | 5.48 | 5.31 | 5.3 | 0.18 |
| Isobutylmethylether | 4.44 | 4.23 | 4.24 | 0.2 |
| iso-Butylsilane | 4.63 | 4.76 |  | -0.13 |
| Isobutyronitrile | 3.66 | 4 | 4.03 | -0.37 |
| Isocrotonic acid | 1.91 | 2.28 | 2.3 | -0.39 |
| Isocumene | 2.65 | 2.3 | 2.3 | 0.35 |
| Isooctane | 3.82 | 3.73 | 3.77 | 0.05 |
| Isopentane | 4.94 | 4.73 | 4.75 | 0.19 |
| Isopentene | 4.91 | 4.84 | 4.87 | 0.04 |
| Isopentyl alcohol | 2.5 | 2.77 | 2.78 | -0.28 |
| Isopentyl bromide | 3.66 | 3.39 | 3.38 | 0.28 |
| Isopentyl formate | 3.3 | 3.38 | 3.39 | -0.09 |
| Isophytol | -3 | -2.8 | -2.86 | -0.14 |
| Isoprene | 4.88 | 5.01 | 5.06 | -0.18 |
| Isopropyl formate | 4.26 | 4.3 | 4.3 | -0.04 |
| Isopropyl lactate | 2.38 | 1.9 | 1.94 | 0.44 |
| Isopropyl methyl ether | 4.9 | 4.68 | 4.7 | 0.2 |
| iso-Propyl nitrite | 4.78 | 4.83 | 4.85 | -0.07 |
| Isopropyl propyl ether | 4.06 | 3.93 | 3.94 | 0.12 |
| Isopropylacetate | 3.9 | 3.81 | 3.82 | 0.08 |
| Isopropylamine | 4.88 | 4.51 | 4.51 | 0.37 |
| Isopropylcyclohexane | 2.8 | 2.91 | 2.89 | -0.09 |
| Isopropylcyclopentane | 3.33 | 3.64 | 3.63 | -0.3 |
| Isopulegol | 1.35 | 1.37 | 1.33 | 0.02 |
| Isoquinoline | 0.83 | 0.73 | 0.67 | 0.16 |
| Linalool | 1.33 | 1.52 | 1.58 | -0.25 |
| Linalyl acetate | 1.09 | 1.35 | 1.44 | -0.35 |
| Lindane | -0.78 | -0.7 | -0.61 | -0.17 |
| L-Menthone | 1.58 | 1.24 | 1.22 | 0.36 |
| Malathion | -2.86 | -3.04 | -3.11 | 0.25 |
| Malonic acid | -2.14 | -2.07 | -2.09 | -0.05 |
| m-Cresol | 1.28 | 1.49 | 1.5 | -0.22 |
| Menthol | 0.86 | 1.26 | 1.28 | -0.43 |
| Methacrolein | 4.32 | 4.27 | 4.31 | 0.01 |
| Methanethiol | 5.08 | 5.02 | 5.04 | 0.04 |
| Methanol | 4.23 | 4.2 | 4.19 | 0.04 |
| Methoxybenzene | 2.7 | 3.05 | 3.04 | -0.35 |
| Methyl acetate | 4.45 | 4.32 | 4.33 | 0.12 |
| Methyl acrylate | 4.07 | 4.02 | 4.02 | 0.04 |
| Methyl arachidate | -3.82 | -4.14 | -4.14 | 0.32 |
| Methyl benzoate | 1.7 | 1.68 | 1.67 | 0.03 |
| Methyl cellosolve | 3.11 | 2.94 | 2.95 | 0.16 |
| Methyl decanoate | 0.75 | 0.56 | 0.56 | 0.19 |
| Methyl docosanoate | -5.05 | -5.08 | -5.07 | 0.02 |
| Methyl formate | 4.89 | 4.81 | 4.82 | 0.07 |
| Methyl heneicosanoate | -4.5 | -4.61 | -4.6 | 0.1 |
| Methyl heptacosanoate | -7.38 | -7.43 | -7.41 | 0.03 |
| Methyl heptadecanoate | -2.52 | -2.73 | -2.7 | 0.18 |
| Methyl hexacosanoate | -6.9 | -6.96 | -6.96 | 0.06 |
| Methyl hexadecanoate | -2.05 | -2.26 | -2.26 | 0.21 |
| Methyl hexanoate | 2.69 | 2.44 | 2.45 | 0.24 |
| Methyl hydroxyacetate | 2.48 | 2.35 | 2.35 | 0.13 |
| Methyl isoamyl ketone | 2.85 | 3.01 | 3.01 | -0.16 |
| Methyl isobutyl ketone | 3.43 | 3.48 | 3.48 | -0.05 |
| Methyl laurate | -0.15 | -0.38 | -0.35 | 0.2 |
| Methyl levulinate | 1.65 | 2.13 | 2.12 | -0.48 |
| Methyl methacrylate | 3.71 | 3.75 | 3.74 | -0.03 |
| Methyl nonadecanoate | -3.36 | -3.67 | -3.65 | 0.29 |
| Methyl nonanoate | 1.23 | 1.03 | 1.03 | 0.2 |
| Methyl octacosanoate | -7.86 | -7.9 | -7.89 | 0.03 |
| Methyl octadecanoate | -3.07 | -3.2 | -3.19 | 0.12 |
| Methyl octanoate | 1.7 | 1.5 | 1.53 | 0.17 |
| Methyl pentacosanoate | -6.43 | -6.49 | -6.48 | 0.05 |
| Methyl pentadecanoate | -1.57 | -1.79 | -1.79 | 0.22 |
| Methyl propanoate | 4.04 | 3.85 | 3.86 | 0.18 |
| Methyl propyl sulfide | 3.83 | 3.78 | 3.78 | 0.05 |
| Methyl t-butyl sulfide | 3.82 | 3.84 | 3.89 | -0.07 |
| Methyl tetracosanoate | -5.94 | -6.02 | -6 | 0.06 |
| Methyl tetradecanoate | -1.18 | -1.32 | -1.32 | 0.14 |
| Methyl t-pentyl ether | 4 | 4 | 4 | 0 |
| Methyl tridecanoate | -0.64 | -0.85 | -0.83 | 0.19 |
| Methyl undecanoate | 0.29 | 0.09 | 0.11 | 0.18 |
| Methyl valerate | 3.15 | 2.91 | 2.91 | 0.24 |
| Methylacetamide | 1.2 | 1.64 | 1.7 | -0.5 |
| Methylacetoacetate | 2.39 | 2.6 | 2.59 | -0.2 |
| Methylamine | 5.36 | 5.08 | 5.08 | 0.28 |
| Methylbenzene | 3.55 | 3.24 | 3.22 | 0.33 |
| Methylchloroacetate | 3 | 3.25 | 3.24 | -0.24 |
| Methylcyclohexane | 3.79 | 3.59 | 3.59 | 0.2 |
| Methylcyclopentane | 4.26 | 3.72 | 3.69 | 0.57 |
| Methylenanthate | 2.23 | 1.97 | 1.98 | 0.25 |
| Methylenecyclohexane | 3.73 | 3.02 | 2.98 | 0.75 |
| Methylisocyanate | 4.78 | 4.8 |  | -0.02 |
| Methyllactate | 2.66 | 2.4 | 2.4 | 0.26 |
| Methylmalonic acid | -2.96 | -2.28 | -2.24 | -0.72 |
| Methylnitrite | 5.63 | 5.34 | 5.23 | 0.4 |
| Methyl-n-propylketone | 3.69 | 3.69 | 3.69 | 0 |
| Methyloxiran | 4.87 | 4.72 | 4.7 | 0.17 |
| Methylparathion | -2.33 | -2.16 | -2.18 | -0.15 |
| Methylphosphonic acid dimethyl ester | 2.05 | 2.34 |  | -0.29 |
| Methylpropylether | 4.79 | 4.44 | 4.44 | 0.35 |
| Methylthio bis(trifluoromethyl)phosphine | 3.89 | 3.86 | 3.81 | 0.08 |
| Metolachlor | -2.38 | -2.36 | -2.27 | -0.11 |
| Molinate | -0.13 | -0.17 |  | 0.04 |
| Monocrotophos | -2.03 | -2.04 | -2.04 | 0.01 |
| Morpholine | 3.12 | 3.58 | 3.53 | -0.41 |
| MTBE | 4.54 | 4.47 | 4.47 | 0.07 |
| m-Toluidine | 1.6 | 1.29 | 1.25 | 0.35 |
| Mustard gas | 1.18 | 1.62 | 1.66 | -0.48 |
| Myristyl alcohol | -1.82 | -1.72 | -1.7 | -0.12 |
| N,N-Dibutylformamide | 0.61 | 0.34 | 0.27 | 0.34 |
| N,N-Diethylaniline | 1.26 | 1.37 | 1.39 | -0.13 |
| N,N-Diethylformamide | 2.17 | 2.22 | 2.16 | 0.01 |
| N,N-Dimethyl-1-naphthylamine | 0.02 | -0.31 | -0.45 | 0.47 |
| N,N-Dimethyl-2,3-dimethyl-3-phenyl-2-butanamine | 0.26 | 0.64 | 0.68 | -0.42 |
| N,N-Dimethyl-3-methyl-3-phenyl-2-butaneamine | 0.81 | 0.79 | 0.82 | -0.01 |
| N,N-Dimethylaniline | 1.99 | 2.19 | 2.23 | -0.24 |
| N,N-Dimethylbenzylamine | 2.25 | 1.95 | 1.93 | 0.32 |
| N,N-Dimethyldodecylamine | -0.07 | -0.11 | -0.09 | 0.02 |
| N,N-Dimethylethanolamine | 2.93 | 2.64 | 2.64 | 0.29 |
| N,N-Dimethylformamide | 2.74 | 3.04 | 3.19 | -0.45 |
| N,N-Dimethylhexadecylamine | -1.99 | -1.99 | -1.96 | -0.03 |
| N,N-Dimethyloctylamine | 1.81 | 1.77 | 1.77 | 0.04 |
| N,N-Dimethyltetradecylamine | -1.04 | -1.05 | -1.05 | 0.01 |
| N,N-Dipropylformamide | 1.5 | 1.28 | 1.22 | 0.28 |
| Naphthalene | 1.03 | 1 | 0.98 | 0.05 |
| N-Benzylformamide | -1.35 | -1.31 | -1.32 | -0.03 |
| n-Butyl acetate | 3.18 | 3.1 | 3.1 | 0.08 |
| n-Butyl acrylate | 2.86 | 2.8 | 2.81 | 0.05 |
| n-Butyl methyl ether | 4.26 | 3.97 | 3.94 | 0.32 |
| n-Butylbenzoate | 0.67 | 0.46 | 0.44 | 0.23 |
| n-Butylethylether | 3.86 | 3.69 | 3.69 | 0.17 |
| N-Butylformamide | 0.51 | 0.39 | 0.35 | 0.16 |
| n-Butylformate | 3.58 | 3.59 | 3.6 | -0.02 |
| n-Butylmethacrylate | 2.47 | 2.53 | 2.52 | -0.05 |
| n-Butylmethylsulfide | 3.32 | 3.31 | 3.32 | 0 |
| n-Decyl alcohol | 0.06 | 0.16 | 0.17 | -0.11 |
| n-Decylacetate | 0.49 | 0.28 | 0.31 | 0.18 |
| n-Decylamine | 1.05 | 0.91 | 0.92 | 0.13 |
| n-Dodecylamine | 0.31 | -0.03 | -0.02 | 0.33 |
| Neburon | -5.2 | -5.13 |  | -0.07 |
| Neohexane | 4.63 | 4.41 | 4.41 | 0.22 |
| N-Ethylmorpholine | 2.84 | 3.26 | 3.25 | -0.41 |
| n-Heptaldehyde | 2.67 | 2.49 | 2.5 | 0.17 |
| n-Heptylamine | 2.46 | 2.32 | 2.33 | 0.13 |
| n-Hexanoic acid | 0.78 | 1.14 | 1.14 | -0.36 |
| n-Hexylacetate | 2.24 | 2.16 | 2.16 | 0.08 |
| n-Hexylamine | 2.85 | 2.79 | 2.8 | 0.04 |
| Nitrobenzene | 1.51 | 1.46 | 1.46 | 0.05 |
| Nitrocyclohexane | 1.67 | 1.76 |  | -0.09 |
| Nitroethane | 3.44 | 3.64 | 3.71 | -0.27 |
| Nitroisobutane | 2.94 | 2.96 | 2.98 | -0.04 |
| N-Methyl-2,3-dimethyl-3-phenyl-2-butaneamine | 0.33 | 0.55 | 0.57 | -0.24 |
| N-Methyl-2-pyrrolidone | 1.66 | 1.67 | 1.75 | -0.09 |
| N-Methyl-3-methyl-3-phenyl-2-butaneamine | 1.01 | 0.7 | 0.69 | 0.32 |
| N-Methylformamide | 1.55 | 1.74 | 1.82 | -0.27 |
| N-Methylmorpholine | 3.48 | 3.67 | 3.67 | -0.19 |
| N-Methylpiperidine | 3.41 | 3.51 | 3.49 | -0.08 |
| N-Methylpropionamide | 1.57 | 1.17 | 1.11 | 0.46 |
| N-Methylpyrrolidine | 4.13 | 4.24 | 4.24 | -0.11 |
| N-Methylsuccinimide | 0.32 | 0.33 | 0.39 | -0.07 |
| N-Nitrosodiethylamine | 2.2 | 1.85 | 1.74 | 0.46 |
| N-Nitrosodimethylamine | 2.7 | 2.67 | 2.67 | 0.03 |
| N-Nitrosopiperidine | 1.27 | 1.18 | 1.13 | 0.14 |
| N-Nitrosopyrrolidine | 1.07 | 1.55 | 1.68 | -0.61 |
| n-Nonanal | 1.93 | 1.55 | 1.53 | 0.4 |
| n-Nonylamine | 1.59 | 1.38 | 1.39 | 0.2 |
| n-Nonylmercaptan | 1.48 | 1.24 | 1.23 | 0.25 |
| n-Octanoic acid | -0.34 | 0.2 | 0.21 | -0.55 |
| n-Octylacetate | 1.39 | 1.22 | 1.22 | 0.17 |
| n-Octylamine | 1.89 | 1.85 | 1.85 | 0.04 |
| Nonacosane | -6.99 | -6.81 | -6.82 | -0.17 |
| Nonadecane | -2.18 | -2.11 | -2.11 | -0.07 |
| Nonafluorocyclopentane | 4.78 | 4.8 | 4.81 | -0.03 |
| Nonane | 2.76 | 2.59 | 2.6 | 0.16 |
| Nonanedinitrile | 0.71 | 0.19 | 0.14 | 0.57 |
| Nonanedioic acid | -5.07 | -4.89 | -4.9 | -0.17 |
| Nonylbenzene | -0.25 | -0.52 | -0.5 | 0.25 |
| Nopinene | 2.61 | 2.64 | 2.61 | 0 |
| n-Propyl acetate | 3.65 | 3.57 | 3.57 | 0.08 |
| n-Propyl benzoate | 1.06 | 0.93 | 0.92 | 0.14 |
| n-Propyl iodide | 3.76 | 3.6 | 3.59 | 0.17 |
| n-Propylformate | 4.05 | 4.06 | 4.08 | -0.03 |
| n-Propylnitrate | 3.5 | 3.54 | 3.55 | -0.05 |
| n-Undecylamine | 0.46 | 0.44 | 0.44 | 0.02 |
| n-Valeraldehyde | 3.67 | 3.43 | 3.46 | 0.21 |
| O,O-Diethyl O-2-diethylaminoethyl phosphate | -0.59 | -0.68 | -0.67 | 0.08 |
| O,O-Diethyl O-2-diethylaminoethyl thiophosphate | -0.56 | -0.68 | -0.73 | 0.17 |
| O,O-Diethyl O-2-dimethylaminoethyl thiophosphate | -0.01 | 0.14 | 0.18 | -0.18 |
| O,O-Diethyl O-3-(1-dimethylamino)prop-2-yl thiophosphate | -0.2 | -0.09 | -0.12 | -0.08 |
| O,O-Diethyl O-3-diethylaminopropyl thiophosphate | -1 | -1.15 | -1.18 | 0.18 |
| O,O-Diethyl S-2-diethylaminoethyl dithiophosphate | -1.35 | -1.4 | -1.46 | 0.11 |
| o-Cresol | 1.59 | 1.49 | 1.47 | 0.12 |
| Octachlorodibenzofuran | -6.59 | -6.58 | -6.56 | -0.02 |
| Octachlorodibenzo-p-dioxin | -7.18 | -7.06 | -6.99 | -0.19 |
| Octachloronaphthalene | -4.25 | -4.12 | -4.12 | -0.13 |
| Octacosane | -6.5 | -6.34 | -6.35 | -0.15 |
| Octadecane | -1.7 | -1.64 | -1.64 | -0.06 |
| Octamethylcyclotetrasiloxane | 2.08 | 2.18 | 2.19 | -0.11 |
| Octamethyltrisiloxane | 2.72 | 2.73 |  | -0.01 |
| Octane | 3.26 | 3.06 | 3.07 | 0.19 |
| Octanedioic acid | -4.74 | -4.42 | -4.42 | -0.32 |
| Octatetracontane | -15.97 | -15.74 | -15.72 | -0.25 |
| Octatriacontane | -11.29 | -11.04 | -11.05 | -0.24 |
| Octyl glycolate | -0.22 | -0.74 | -0.75 | 0.53 |
| Octyl-1,2-dinitrate | -0.04 | -0.1 | -0.1 | 0.06 |
| Octylbenzene | 0.24 | -0.05 | -0.05 | 0.29 |
| o-Cumenol | 1.21 | 0.81 | 0.8 | 0.41 |
| o-Toluidine | 1.53 | 1.29 | 1.25 | 0.28 |
| Oxetane | 4.65 | 4.9 | 4.88 | -0.23 |
| Oxirane | 5.24 | 4.95 | 4.91 | 0.33 |
| Parathion | -2.87 | -2.72 | -2.77 | -0.1 |
| PCNB | -1.83 | -1.74 | -1.73 | -0.1 |
| p-Cresol | 1.24 | 1.49 | 1.51 | -0.27 |
| p-Cymene | 2.33 | 2.3 | 2.31 | 0.02 |
| Pelargonic acid | -0.79 | -0.27 | -0.23 | -0.56 |
| Pentachlorobenzene | 0.24 | 0.3 | 0.28 | -0.05 |
| Pentachloroethane | 2.67 | 2.78 | 2.78 | -0.11 |
| Pentachlorophenol | -1.83 | -1.45 | -1.47 | -0.36 |
| Pentacontane | -16.84 | -16.68 | -16.65 | -0.19 |
| Pentacosane | -5.09 | -4.93 | -4.9 | -0.19 |
| Pentadecane | -0.24 | -0.23 | -0.2 | -0.04 |
| Pentadecylamine | -1.44 | -1.44 | -1.44 | 0 |
| Pentaethylbenzene | -0.34 | -0.15 | -0.06 | -0.28 |
| Pentafluoro(fluorosulfonato)sulfur | 4.77 | 4.75 |  | 0.02 |
| Pentafluorobenzene | 3.96 | 4 | 4.03 | -0.08 |
| Pentafluoroethane | 6.12 | 5.75 | 5.75 | 0.37 |
| Pentafluorophenol | 2.48 | 2.25 | 2.25 | 0.23 |
| Pentane | 4.8 | 4.47 | 4.49 | 0.31 |
| Pentane-1,4-dinitrate | 0.97 | 0.97 | 0.97 | 0 |
| Pentanedinitrile | 2.23 | 2.07 | 2.02 | 0.21 |
| Pentanedioic acid | -2.91 | -3.01 | -3.02 | 0.11 |
| Pentanenitrile | 2.99 | 3.27 | 3.3 | -0.31 |
| Pentanoic acid | 1.53 | 1.61 | 1.58 | -0.05 |
| Pentatriacontane | -9.9 | -9.63 | -9.64 | -0.25 |
| Pentyl butyrate | 2.04 | 1.69 | 1.69 | 0.35 |
| Pentyl glycolate | 1.16 | 0.67 | 0.66 | 0.5 |
| Pentyl t-octyl ether | 1.31 | 1.31 | 1.33 | -0.03 |
| Pentyl-1,2-dinitrate | 1.38 | 1.31 | 1.3 | 0.08 |
| Pentylcyclopentane | 2.18 | 2.44 | 2.41 | -0.23 |
| Perchlorobiphenyl | -5.86 | -5.8 | -5.75 | -0.11 |
| Perfluoro-1,4-dithiane | 4.24 | 4.18 | 4.1 | 0.14 |
| Perfluoro-1,4-dithiane S,S'-bis(tetrafluoride) | 3.1 | 3.46 |  | -0.36 |
| Perfluoro-2-(fluorosulfato)butane | 4.24 | 4.25 |  | -0.01 |
| Perfluoro-2,3-dimethylbutane | 4.43 | 4.62 | 4.71 | -0.28 |
| Perfluoro-2-methylbutane | 4.94 | 4.97 | 4.96 | -0.02 |
| Perfluoro-2-methylpentane | 4.48 | 4.6 | 4.59 | -0.11 |
| Perfluoro-3-methylpentane | 4.48 | 4.6 | 4.57 | -0.09 |
| Perfluorobutane | 5.44 | 5.32 | 5.27 | 0.17 |
| Perfluorobutylhexane | 2.64 | 2.51 | 2.53 | 0.11 |
| Perfluorobutyloctane | 1.76 | 1.57 | 1.62 | 0.14 |
| Perfluorobutylpentane | 3.07 | 2.98 | 2.99 | 0.08 |
| Perfluorocyclobutane | 5.5 | 5.14 | 5.08 | 0.42 |
| Perfluorocyclohexane | 4.47 | 4.4 | 4.38 | 0.09 |
| Perfluorocyclopentane | 5.05 | 5.03 | 5.03 | 0.02 |
| Perfluoro-dibutylmethylamine | 2.92 | 2.97 |  | -0.05 |
| Perfluorodiethylsulfur disulfide | 4.27 | 4.17 | 4.21 | 0.06 |
| Perfluorodiglyme | 4.28 | 4.35 | 4.36 | -0.08 |
| Perfluorodimethylsulfur difluoride | 5.07 | 5.09 | 5.13 | -0.06 |
| Perfluoroethane | 6.5 | 6.06 | 6.03 | 0.47 |
| Perfluoroethylcyclohexane | 3.7 | 3.68 | 3.67 | 0.03 |
| Perfluoroethylmethylsulfide | 5.29 | 5.3 | 5.31 | -0.02 |
| Perfluoroethylmethylsulfur difluoride | 4.7 | 4.63 | 4.61 | 0.09 |
| Perfluorohexane | 4.47 | 4.58 | 4.56 | -0.09 |
| Perfluorohexanoic acid | 1.84 | 1.63 | 1.64 | 0.2 |
| Perfluorohexylhexane | 1.86 | 1.77 | 1.79 | 0.07 |
| Perfluoromethylcyclohexane | 4.15 | 4.05 | 4.08 | 0.07 |
| Perfluoromethylpropylsulfide | 4.8 | 4.93 | 4.95 | -0.15 |
| Perfluoromethylpropylsulfur difluoride | 4.26 | 4.26 | 4.27 | -0.01 |
| Perfluorooctylethylene | 2.68 | 3.08 | 3.15 | -0.47 |
| Perfluoropentane | 4.94 | 4.95 | 4.95 | -0.01 |
| Perfluoropropane | 5.95 | 5.69 | 5.64 | 0.31 |
| Perfluoropropene | 5.87 | 6.09 |  | -0.22 |
| Perfluorotetrahydrofuran | 5.41 | 5.01 | 4.93 | 0.48 |
| Perfluorotetrahydrothiophene | 4.79 | 4.8 | 4.78 | 0.01 |
| Perfluorotoluene | 3.59 | 3.83 | 3.87 | -0.28 |
| Perfluoro-trans-1,2-dimethylcyclobutane | 4.7 | 4.44 | 4.35 | 0.34 |
| Perfluoro-trans-decalin | 2.96 | 2.94 | 2.96 | 0 |
| Perfluorotributylamine | 1.83 | 1.94 | 2 | -0.17 |
| Perfluorotriethylamine | 4.24 | 4.16 | 4.14 | 0.1 |
| Perfluorotriglyme | 3.5 | 3.34 | 3.19 | 0.31 |
| Perfluorotripropylamine | 3.05 | 3.05 |  | 0 |
| Permethrin | -5.51 | -5.39 | -5.58 | 0.07 |
| Perylene | -6.26 | -6.14 | -6.23 | -0.03 |
| Phenanthrene | -1.59 | -1.5 | -1.55 | -0.04 |
| Phencyclidine | -1.55 | -1.46 | -1.48 | -0.07 |
| Phenethyl acetate | 1.12 | 0.93 | 0.93 | 0.19 |
| Phenethyl alcohol | 1.08 | 0.81 | 0.81 | 0.27 |
| Phenethyl butyrate | 0.28 | -0.01 | -0.01 | 0.29 |
| Phenethyl hexanoate | -0.64 | -0.95 | -0.96 | 0.32 |
| Phenethyl propionate | 0.68 | 0.46 | 0.44 | 0.24 |
| Phenol | 1.67 | 1.75 | 1.73 | -0.06 |
| Phenthoate | -3.46 | -3.37 | -3.37 | -0.09 |
| Phenylacetic acid | -0.29 | -0.09 | -0.16 | -0.13 |
| Phenylisocyanate | 2.55 | 2.56 |  | -0.01 |
| Phlorol | 1.33 | 1.02 | 1.01 | 0.32 |
| Phorate | -0.6 | -0.79 |  | 0.19 |
| Phosmet | -4.7 | -4.69 |  | -0.01 |
| Phytane | -1.74 | -1.54 | -1.51 | -0.23 |
| Phytol | -3.59 | -3.36 | -3.41 | -0.17 |
| Pimelonitrile | 1.29 | 1.13 | 1.04 | 0.25 |
| Pinacolone | 3.64 | 3.63 | 3.63 | 0.01 |
| Piperidine | 3.61 | 3.42 | 3.38 | 0.23 |
| p-Menthadiene | 2.44 | 1.93 | 1.87 | 0.57 |
| Pristane | -1.25 | -1.07 | -1.07 | -0.18 |
| Prometryn | -3.77 | -3.7 |  | -0.07 |
| Propanal | 4.63 | 4.37 | 4.36 | 0.27 |
| Propane | 5.97 | 5.41 | 5.42 | 0.55 |
| Propane-1,3-dithiol | 2.71 | 2.71 | 2.68 | 0.03 |
| Propanenitrile | 3.8 | 4.21 | 4.26 | -0.46 |
| Propanil | -2.27 | -2.44 | -2.34 | 0.07 |
| Propanoic acid | 2.67 | 2.55 | 2.53 | 0.14 |
| Propanolamine | 2.31 | 2.24 | 2.23 | 0.08 |
| Propanone | 4.51 | 4.63 | 4.63 | -0.12 |
| Propazine | -4.76 | -4.48 |  | -0.28 |
| Propenal | 4.58 | 4.54 | 4.56 | 0.02 |
| Propoxur | -2.77 | -2.79 | -2.79 | 0.02 |
| Propyl 2-methylbutanoate | 2.66 | 2.42 | 2.43 | 0.23 |
| Propyl butyrate | 2.8 | 2.63 | 2.63 | 0.17 |
| Propyl glycolate | 1.97 | 1.61 | 1.62 | 0.35 |
| Propyl lactate | 2.08 | 1.66 | 1.65 | 0.43 |
| Propyl nitrite | 4.63 | 4.59 | 4.5 | 0.13 |
| Propyl propanoate | 3.26 | 3.1 | 3.12 | 0.14 |
| Propyl tert-amyl ether | 3.3 | 3.25 | 3.24 | 0.06 |
| Propyl t-octyl ether | 2.34 | 2.25 | 2.23 | 0.11 |
| Propyl-1,2-dinitrate | 2.18 | 2.25 | 2.26 | -0.08 |
| Propylacetamide | 0.58 | 0.76 | 0.72 | -0.14 |
| Propylcyclohexane | 2.74 | 2.65 | 2.63 | 0.11 |
| Propylcyclopentane | 3.21 | 2.9 | 2.89 | 0.32 |
| Propylene | 5.77 | 5.58 | 5.59 | 0.18 |
| Propylenediamine | 3.17 | 3.3 | 3.3 | -0.13 |
| Propylsilane | 5.06 | 4.97 |  | 0.09 |
| Propyne | 5.51 | 5.61 | 5.63 | -0.12 |
| p-Toluidine | 1.54 | 1.29 | 1.31 | 0.23 |
| Pulegone | 1.24 | 0.98 | 0.96 | 0.28 |
| Pyrene | -3.38 | -3.64 | -3.69 | 0.31 |
| Pyridine | 3.44 | 3.23 | 3.19 | 0.25 |
| Pyrrolidine | 3.93 | 4.15 | 4.09 | -0.16 |
| Pyruvaldehyde | 3.55 | 3.59 | 3.55 | 0 |
| Quinoline | 0.92 | 0.57 |  | 0.35 |
| R-1234yf | 5.83 | 5.79 |  | 0.04 |
| R134a | 5.82 | 5.78 | 5.83 | -0.01 |
| Raspberry ketone | -0.45 | -0.7 | -0.7 | 0.25 |
| Refrigerant 115 | 5.96 | 5.68 | 5.65 | 0.31 |
| s-Butylacetate | 3.35 | 3.34 | 3.38 | -0.03 |
| s-Butylamine | 4.37 | 4.04 | 4.04 | 0.33 |
| s-Butylbenzene | 2.35 | 2.09 | 2.09 | 0.26 |
| s-Butylnitrite | 4.27 | 4.36 | 4.37 | -0.1 |
| Sebaconitrile | 0.37 | -0.28 | -0.37 | 0.74 |
| sec-Hexyl acetate | 2.72 | 2.66 | 2.65 | 0.07 |
| s-Phenethyl alcohol | 1.38 | 1.33 | 1.29 | 0.08 |
| s-trans-1,3-Butadiene | 5.45 | 5.28 | 5.29 | 0.16 |
| Styrene | 2.95 | 2.94 | 2.95 | 0 |
| Styrene oxide | 1.6 | 2.08 | 2.06 | -0.46 |
| Suberonitrile | 1.03 | 0.66 | 0.57 | 0.46 |
| Sulcatone | 2.22 | 2.68 | 2.7 | -0.49 |
| t-Butyl lactate | 2.24 | 1.69 | 1.62 | 0.62 |
| t-Butylacetamide | 0.78 | 0.92 | 0.96 | -0.18 |
| t-Butylamine | 4.69 | 4.36 | 4.31 | 0.38 |
| t-Butylbenzene | 2.46 | 2.24 | 2.25 | 0.21 |
| t-Butylhydroperoxide | 2.86 | 2.92 |  | -0.06 |
| t-Butylmercaptan | 4.38 | 4.12 | 4.04 | 0.34 |
| t-Butylnitrite | 4.39 | 4.62 | 4.68 | -0.29 |
| t-Butylthio bis(trifluoromethyl)phosphine | 2.95 | 2.96 | 3.01 | -0.06 |
| Terbufos | -1.46 | -1.2 |  | -0.26 |
| Terbutryn | -3.66 | -3.69 |  | 0.03 |
| Tetrachloroethylene | 3.4 | 3.64 | 3.79 | -0.39 |
| Tetracontane | -12.26 | -11.98 | -11.95 | -0.31 |
| Tetracosane | -4.63 | -4.46 | -4.43 | -0.2 |
| Tetradecane | 0.11 | 0.24 | 0.25 | -0.14 |
| Tetradecylbenzene | -2.7 | -2.87 | -2.86 | 0.16 |
| Tetraethylmethane | 3.01 | 3 | 3.05 | -0.04 |
| Tetrafluoroethene | 6.53 | 6.62 | 6.76 | -0.23 |
| Tetrahydrofuran | 4.33 | 4.09 | 4.1 | 0.23 |
| Tetrahydropyran | 3.98 | 3.96 | 3.91 | 0.07 |
| Tetramethylene glycol | 0.16 | 0.28 | 0.26 | -0.1 |
| Tetramethylethene | 4.22 | 4.6 | 4.65 | -0.43 |
| Tetrapentacontane | -18.53 | -18.56 | -18.53 | 0 |
| Tetratetracontane | -14.12 | -13.86 | -13.87 | -0.25 |
| Thianaphthene | 1.45 | 1.52 | 1.46 | -0.01 |
| Thietane | 3.85 | 3.86 | 3.84 | 0.01 |
| Thiobencarb | -2.75 | -2.65 |  | -0.1 |
| Thiolane | 3.41 | 3.7 | 3.68 | -0.27 |
| Thiophene | 4.02 | 3.9 | 3.83 | 0.19 |
| TNT | -2.76 | -2.88 | -2.95 | 0.19 |
| Tolclofos-methyl | -1.24 | -1.66 | -1.69 | 0.45 |
| trans,trans-2,4-Hexadienyl acetate | 1.95 | 2.56 | 2.56 | -0.61 |
| trans-1,2-Dibromocycloheptane | 1.33 | 1.41 | 1.4 | -0.07 |
| trans-1,2-Dibromocyclohexane | 1.49 | 1.54 | 1.55 | -0.06 |
| trans-1,2-Dibromocyclooctane | 1.04 | 1.28 | 1.31 | -0.27 |
| trans-1,2-Dibromocyclopentane | 2.15 | 2.27 | 2.29 | -0.14 |
| trans-1,2-Dibromoethene | 3.61 | 3.58 |  | 0.03 |
| trans-1,2-Dichloroethylene | 4.42 | 4.44 | 4.47 | -0.05 |
| trans-1,2-Dimethylcyclohexane | 3.29 | 3.38 | 3.33 | -0.04 |
| trans-1,2-Dimethylcyclopentane | 3.93 | 4.11 | 4.11 | -0.18 |
| trans-1,3,5-Hexatriene | 4.08 | 4.54 | 4.54 | -0.46 |
| trans-1,3-Dichloropropene | 3.67 | 3.72 | 3.73 | -0.06 |
| trans-1,3-Dimethylcyclohexane | 3.37 | 3.38 | 3.36 | 0.01 |
| trans-1,3-Dimethylcyclopentane | 3.93 | 4.11 | 4.1 | -0.17 |
| trans-1,3-Pentadiene | 4.76 | 4.84 | 4.84 | -0.08 |
| trans-1,4-Dichloro-2-butene | 2.66 | 3 | 2.99 | -0.33 |
| trans-1,4-Dimethylcyclohexane | 3.47 | 3.38 | 3.37 | 0.1 |
| trans-1,4-Hexadiene | 4.37 | 4.37 | 4.37 | 0 |
| trans-1-Propenylbenzene | 2.27 | 2.5 | 2.52 | -0.25 |
| trans-2-Butene | 5.37 | 5.14 | 5.13 | 0.24 |
| trans-2-Decene | 2.27 | 2.32 | 2.31 | -0.04 |
| trans-2-Dodecene | 1.21 | 1.38 | 1.39 | -0.18 |
| trans-2-Heptene | 3.85 | 3.73 | 3.74 | 0.11 |
| trans-2-Hexene | 4.32 | 4.2 | 4.2 | 0.12 |
| trans-2-Methoxy-4-(1-propenyI)phenol | -0.22 | 0.3 | 0.31 | -0.53 |
| trans-2-Methylcyclohexanol | 2.22 | 2.15 | 2.15 | 0.07 |
| trans-2-Octene | 3.38 | 3.26 | 3.26 | 0.11 |
| trans-2-Pentene | 4.84 | 4.67 | 4.69 | 0.15 |
| trans-2-Phenylcyclopropylamine | 1.19 | 1.04 | 0.97 | 0.22 |
| trans-3-Heptene | 3.83 | 3.73 | 3.74 | 0.09 |
| trans-3-Hexene | 4.32 | 4.2 | 4.21 | 0.11 |
| trans-3-Methylcyclohexanol | 1.9 | 2.15 | 2.11 | -0.21 |
| trans-3-Octene | 3.36 | 3.26 | 3.25 | 0.11 |
| trans-4,4-Dimethyl-2-pentene | 4.17 | 4.14 | 4.17 | 0 |
| trans-4,6-Dimethyl-1,3-dioxane | 2.73 | 2.99 | 3.07 | -0.35 |
| trans-4-Octene | 3.39 | 3.26 | 3.26 | 0.13 |
| trans-Crotononitrile | 3.36 | 3.94 | 3.97 | -0.61 |
| trans-Cycloheptane-1,2-dinitrate | 0.05 | 0.41 | 0.42 | -0.37 |
| trans-Cyclohexane-1,2-dinitrate | 0.75 | 0.54 | 0.46 | 0.29 |
| trans-Cyclohexane-1,3-dinitrate | 0.71 | 0.54 | 0.5 | 0.21 |
| trans-Decalin | 2.22 | 2.4 | 2.36 | -0.14 |
| Triacontane | -7.48 | -7.28 | -7.29 | -0.19 |
| Triallate | -1.8 | -1.99 | -2.05 | 0.25 |
| Tributyl borate | 1.04 | 0.79 | 0.75 | 0.29 |
| Tributyl phosphate | -0.82 | -1.39 | -1.51 | 0.69 |
| Tributylamine | 1.32 | 0.95 | 0.96 | 0.36 |
| Trichloroacetic acid | 1.34 | 1.45 | 1.42 | -0.08 |
| Trichloroacetylchloride | 3.44 | 3.18 | 3.07 | 0.37 |
| Trichloroethylene | 3.98 | 4.04 | 4.06 | -0.08 |
| Trichlorosyringol | -1.11 | -1.07 | -1.02 | -0.09 |
| Trichlorotoluene | 1.54 | 1.67 | 1.68 | -0.14 |
| Triclopyr | -2.54 | -2.23 | -2.07 | -0.47 |
| Tricosane | -4.4 | -3.99 | -3.99 | -0.41 |
| Tridecane | 0.76 | 0.71 | 0.73 | 0.03 |
| Tridecylamine | -0.5 | -0.5 | -0.49 | -0.01 |
| Tridecylbenzene | -2.75 | -2.4 | -2.38 | -0.37 |
| Triethanolamine | -3.32 | -3.59 | -3.66 | 0.34 |
| Triethyl borate | 3.35 | 3.61 | 3.67 | -0.32 |
| Triethyl phosphate | 1.25 | 1.43 | 1.47 | -0.22 |
| Triethylamine | 3.88 | 3.77 | 3.79 | 0.09 |
| Triisobutyl borate | 1.68 | 1.57 | 1.55 | 0.13 |
| Triisopropyl borate | 3.06 | 2.92 | 2.85 | 0.21 |
| Trimethoxyborine | 4.26 | 4.45 | 4.51 | -0.25 |
| Trimethyl phosphate | 2.07 | 2.27 | 2.34 | -0.27 |
| Trimethylamine | 5.33 | 5 | 5.02 | 0.31 |
| Trimethylethylene | 4.8 | 4.87 | 4.9 | -0.1 |
| Tripropyl borate | 2.21 | 2.2 | 2.2 | 0.01 |
| Tripropyl phosphate | 0.04 | 0.02 | 0.06 | -0.02 |
| Tripropylamine | 2.3 | 2.36 | 2.4 | -0.1 |
| Triptane | 4.14 | 4.2 | 4.21 | -0.07 |
| Undecane | 1.73 | 1.65 | 1.64 | 0.09 |
| Undecanedioic acid | -5.28 | -5.83 | -5.88 | 0.6 |
| Undecylbenzene | -1.34 | -1.46 | -1.46 | 0.12 |
| Vinclozolin | -3.89 | -3.94 |  | 0.05 |
| Vinyl acetate | 4.19 | 4.39 | 4.48 | -0.29 |
| Vinylidenechloride | 4.88 | 4.83 | 4.92 | -0.04 |
| Vinylpropionate | 3.76 | 3.92 | 3.98 | -0.22 |
| Z-1-Chloro-2,3,3,3-tetrafluoropropene | 5.17 | 5 |  | 0.17 |
| Zingiberene | -0.03 | -0.61 | -0.65 | 0.62 |
